# Supplementary material for: Stealth Metasomatism in Granulites from Ivrea (NW Italy): Hydration of the (Variscan) Lower Crust by Melt Flow
Source: Preprints.org preprint supplement (doi:10.20944/preprints202407.0659.v1), 2024-07-09
Supplement: Supplementary file 1 [file supplementary]

## Sheet: 11_03_24_Batch2_OU1_50mu
Karastergios et al., Metasomatic granulites from Ivrea town area	29Si Internal Standard		Iolite Input
			Date	2024-03-11	2024-03-11	2024-03-11	2024-03-11	2024-03-11	2024-03-11	2024-03-11	2024-03-11	2024-03-11	2024-03-11	2024-03-11	2024-03-11	2024-03-11	2024-03-11
			Duration(s)	23.771	23.252	23.392	24.361	23.477	23.975	24.428	22.521	22.414	22.77	22.531	24.085	21.12	22.463
			Comments	BCR-1	BCR-2	BCR-3	BCR-4	BCR-5	BCR-6	BCR-7	BCR-8	BCR-9	BCR-10	BCR-11	BCR-12	BCR-13	BCR-14
			IntStd (wt% Oxide)	54.4	54.4	54.4	54.4	54.4	54.4	54.4	54.4	54.4	54.4	54.4	54.4	54.4	54.4		Measured/Prefered Values																	Average - STDEV - RSD
Pref Values
BCR-2G (ppm)																				BCR-1	BCR-2	BCR-3	BCR-4	BCR-5	BCR-6	BCR-7	BCR-8	BCR-9	BCR-10	BCR-11	BCR-12	BCR-13	BCR-14	AVERAGE		Average	STDEV	RSD
Li	9.374		Li_ppm_m7	9.33	9.36	9.2	8.99	9.27	9.14	9.37	8.56	8.97	9.44	9.03	8.65	8.82	9.12		Li_ppm_m7	0.995306	0.998507	0.981438	0.959036	0.988905	0.975037	0.999573	0.913164	0.956902	1.00704	0.963303	0.922765	0.9409	0.972904	0.969627		9.08929	0.270994	2.98147
			Li_ppm_m7_Int2SE	0.55	0.57	0.45	0.53	0.44	0.47	0.56	0.46	0.51	0.51	0.46	0.49	0.36	0.52
Be	2.097		Be_ppm_m9	2.23	2.12	2.08	2.06	2.44	1.66	2.08	2.01	2.08	1.94	2.36	1.81	1.78	1.71		Be_ppm_m9	1.06342	1.01097	0.991893	0.982356	1.16357	0.791607	0.991893	0.958512	0.991893	0.925131	1.12542	0.863138	0.848832	0.815451	0.966006		2.02571	0.230708	11.389
			Be_ppm_m9_Int2SE	0.55	0.56	0.43	0.48	0.5	0.51	0.52	0.37	0.56	0.45	0.59	0.45	0.46	0.39
Sc	34.046		Sc_ppm_m45	34.5	34.7	35.6	35.6	34	34.6	33.6	34.5	34.7	34.1	33.1	33.3	35.4	34.7		Sc_ppm_m45	1.01333	1.01921	1.04564	1.04564	0.998649	1.01627	0.9869	1.01333	1.01921	1.00159	0.972214	0.978088	1.03977	1.01921	1.01208		34.4571	0.78222	2.27012
			Sc_ppm_m45_Int2SE	1.7	1.6	1.6	1.4	1.3	1.7	1.5	1.5	1.7	1.5	1.3	1.4	1.9	1.3
V	436.642		V_ppm_m51	448	447	455	441	444	435	445	444	433	433	441	421	440	453		V_ppm_m51	1.02601	1.02372	1.04204	1.00998	1.01685	0.996239	1.01914	1.01685	0.991659	0.991659	1.00998	0.964177	1.00769	1.03746	1.01096		441.429	8.86405	2.00804
			V_ppm_m51_Int2SE	26	19	22	18	19	22	18	17	18	17	20	16	19	20
Cr	16.065		Cr_ppm_m53	16.6	14.7	16.7	16.6	16.9	15.6	17.1	16.9	16.3	17.2	15.5	15.4	15.7	16.8		Cr_ppm_m53	1.0333	0.915033	1.03953	1.0333	1.05198	0.971055	1.06443	1.05198	1.01463	1.07065	0.96483	0.958606	0.97728	1.04575	1.01374		16.2857	0.765463	4.70021
			Cr_ppm_m53_Int2SE	1.7	1.7	1.6	1.4	1.6	1.3	1.8	1.9	1.9	1.6	1.7	1.7	1.9	1.8
Co	38.11		Co_ppm_m59	37.9	37.6	38.8	39.3	38.4	37.1	37.7	35.8	35.8	36.3	37.2	35.9	37.5	39.2		Co_ppm_m59	0.99449	0.986618	1.01811	1.03123	1.00761	0.973498	0.989242	0.939386	0.939386	0.952506	0.976122	0.94201	0.983994	1.0286	0.983057		37.4643	1.20423	3.21434
			Co_ppm_m59_Int2SE	2.1	1.6	1.4	1.4	1.4	1.6	1.5	1.7	1.7	1.7	2	1.4	2.1	1.7
Ni	12.224		Ni_ppm_m60	10.1	12.2	12.4	12	12	10.17	11.8	10.3	10.5	10.96	10.7	10.35	11.3	12.16		Ni_ppm_m60	0.826243	0.998037	1.0144	0.981675	0.981675	0.83197	0.965314	0.842605	0.858966	0.896597	0.875327	0.846695	0.924411	0.994764	0.917048		11.21	0.859839	7.67029
			Ni_ppm_m60_Int2SE	1.1	1.2	1.1	1.2	1	0.84	1.2	1.4	1	0.8	1.2	0.78	1.2	0.99
Cu	18.358		Cu_ppm_m65	15.2	16.1	17.9	17.3	16.6	16.6	14.9	15.8	16.3	15.5	16.8	15.8	16.2	17.8		Cu_ppm_m65	0.827977	0.877002	0.975052	0.942368	0.904238	0.904238	0.811635	0.86066	0.887896	0.844319	0.915132	0.86066	0.882449	0.969605	0.890231		16.3429	0.901891	5.51856
			Cu_ppm_m65_Int2SE	1.1	1	1.5	1.2	1.4	1.4	1.2	1.1	1.3	1.1	1.5	1.2	1.4	1.2
Zn	154.298		Zn_ppm_m66	152.5	152.6	149.2	154.9	151.4	147.3	153.4	147.1	150.4	148.8	153	145.2	155.5	159.6		Zn_ppm_m66	0.988347	0.988995	0.96696	1.0039	0.981218	0.954646	0.99418	0.95335	0.974737	0.964368	0.991588	0.941036	1.00779	1.03436	0.98182		151.493	3.84037	2.53501
			Zn_ppm_m66_Int2SE	8.1	6.5	7.5	8.1	5.5	8.2	6.9	7.4	8	8.7	7	9	9.5	9
Ga	21.537		Ga_ppm_m71	21.5	21.8	22.32	22.7	21.27	21.9	23.4	21.5	22	21.6	21.8	20.7	22.1	23		Ga_ppm_m71	0.998282	1.01221	1.03636	1.054	0.987603	1.01685	1.0865	0.998282	1.0215	1.00293	1.01221	0.961137	1.02614	1.06793	1.02014		21.9707	0.708373	3.22417
			Ga_ppm_m71_Int2SE	1.1	1.3	0.91	1.2	0.97	1.4	1.3	1.1	1.3	1.1	0.96	1	1.5	1.5
Ge	1.81		Ge_ppm_m74	1.73	2.04	1.79	1.75	1.9	1.84	1.75	2.37	1.83	1.41	1.42	1.64	1.85	2.06		Ge_ppm_m74	0.955801	1.12707	0.98895	0.966851	1.04972	1.01657	0.966851	1.30939	1.01105	0.779006	0.78453	0.906077	1.0221	1.13812	1.00158		1.81286	0.247275	13.6401
			Ge_ppm_m74_Int2SE	0.34	0.44	0.39	0.46	0.5	0.47	0.46	0.56	0.41	0.41	0.51	0.44	0.47	0.57
Rb	48.09		Rb_ppm_m85	48.5	48	47.9	50	49	48.3	47.6	47.7	47.1	49.3	48.1	47.4	47.8	49		Rb_ppm_m85	1.00853	0.998129	0.996049	1.03972	1.01892	1.00437	0.989811	0.99189	0.979414	1.02516	1.00021	0.985652	0.99397	1.01892	1.00362		48.2643	0.810135	1.67854
			Rb_ppm_m85_Int2SE	2.6	1.3	1.6	2.3	2.1	2	1.9	2.2	2	2	2.5	1.6	2.6	2.1
Sr	340.328		Sr_ppm_m88	343	337	349	344	333.3	333	328	336	326	337	328	324	334	343		Sr_ppm_m88	1.00785	0.990221	1.02548	1.01079	0.979349	0.978468	0.963776	0.987283	0.957899	0.990221	0.963776	0.952023	0.981406	1.00785	0.985457		335.379	7.44148	2.21883
			Sr_ppm_m88_Int2SE	18	10	15	13	9.8	17	12	11	11	14	17	11	16	16
Y	32.605		Y_ppm_m89	33.6	32.4	34.8	33.6	33.2	32.2	32.6	32.8	32.5	32.2	32.5	32	32.8	33.4		Y_ppm_m89	1.03052	0.993713	1.06732	1.03052	1.01825	0.987579	0.999847	1.00598	0.99678	0.987579	0.99678	0.981445	1.00598	1.02438	1.00905		32.9	0.754474	2.29323
			Y_ppm_m89_Int2SE	1.6	1.2	1.5	1.2	1.3	1.7	1.5	1.1	1.3	1.4	1.6	1.4	1.7	1.3
Zr	175.087		Zr_ppm_m90	180	174.1	182.7	182.4	174.5	170.6	173.8	176.2	172.5	172.2	170.5	170.2	170.6	179.7		Zr_ppm_m90	1.02806	0.994363	1.04348	1.04177	0.996647	0.974373	0.992649	1.00636	0.985224	0.983511	0.973802	0.972088	0.974373	1.02635	0.999503		175	4.48227	2.5613
			Zr_ppm_m90_Int2SE	10	6.9	7.8	7.7	6.1	8.8	6.8	6	5.8	6.6	8.4	6.5	7.7	6.2
Nb	12.117		Nb_ppm_m93	12.43	12.05	12.39	12.18	12.04	11.53	12.1	12.01	11.96	11.89	11.7	11.51	11.69	12.35		Nb_ppm_m93	1.02583	0.994471	1.02253	1.0052	0.993645	0.951556	0.998597	0.991169	0.987043	0.981266	0.965586	0.949905	0.96476	1.01923	0.989342		11.9879	0.299337	2.497
			Nb_ppm_m93_Int2SE	0.67	0.55	0.43	0.53	0.38	0.46	0.57	0.56	0.51	0.56	0.48	0.48	0.45	0.61
Mo	250.491		Mo_ppm_m95	271	268.8	267.5	269	265.7	261	267	257	262	265	266	254	268.8	268		Mo_ppm_m95	1.08188	1.07309	1.0679	1.07389	1.06072	1.04195	1.06591	1.02598	1.04595	1.05792	1.06191	1.01401	1.07309	1.0699	1.05815		265.057	4.89564	1.84701
			Mo_ppm_m95_Int2SE	14	8.7	7.4	10	8	11	10	11	12	11	11	10	8.2	10
Cd	0.203432		Cd_ppm_m111	Below LOD	0.32	0.3	0.108	0.055	0.093	0.17	0.15	0.17	0.07	0.18	Below LOD	0.22	0.17		Cd_ppm_m111	#VALUE!	1.57301	1.4747	0.530891	0.270361	0.457156	0.835661	0.737348	0.835661	0.344096	0.884818	#VALUE!	1.08144	0.835661	0.821734		0.167167	0.0827382	49.4944		Cd concentrations in BCR-2G close or at DL with 50µm spot size
			Cd_ppm_m111_Int2SE	Below LOD	0.16	0.15	0.087	0.063	0.071	0.12	0.11	0.12	0.12	0.12	Below LOD	0.12	0.12
In	0.0980432		In_ppm_m115_corrected	0.06856	0.102642	0.085656	0.088384	0.085792	0.08839	0.088152	0.08839	0.071118	0.059764	0.094846	0.07054	0.06705	0.076316		In_ppm_m115	0.699284	1.04691	0.873656	0.90148	0.875043	0.901542	0.899114	0.901542	0.725374	0.609568	0.96739	0.719479	0.683882	0.778392	0.827332		0.0811143	0.0122436	15.0943		In can be be inhomogenouse in BCR-2G (see Jenner & O'Neill, 2012)
			In_ppm_m115_Int2SE	0.024	0.021	0.027	0.023	0.03	0.031	0.026	0.032	0.025	0.027	0.029	0.022	0.024	0.02
Sn	2.074		Sn_ppm_m118	1.6	1.87	2.16	2.24	2.12	1.65	1.72	1.65	1.73	1.54	1.81	1.9	1.75	2.26		Sn_ppm_m118	0.771456	0.901639	1.04147	1.08004	1.02218	0.795564	0.829315	0.795564	0.834137	0.742527	0.87271	0.916104	0.84378	1.08968	0.89544		1.85714	0.243829	13.1293
			Sn_ppm_m118_Int2SE	0.19	0.2	0.21	0.22	0.2	0.22	0.17	0.17	0.18	0.23	0.25	0.2	0.21	0.21
Sb	0.321		Sb_ppm_m121	0.248	0.259	0.312	0.319	0.302	0.225	0.303	0.212	0.303	0.243	0.291	0.221	0.28	0.325		Sb_ppm_m121	0.772586	0.806854	0.971963	0.993769	0.94081	0.700935	0.943925	0.660436	0.943925	0.757009	0.906542	0.688474	0.872274	1.01246	0.85514		0.2745	0.0390005	14.2078
			Sb_ppm_m121_Int2SE	0.056	0.049	0.063	0.061	0.047	0.058	0.049	0.031	0.056	0.047	0.056	0.043	0.06	0.066
Cs	1.179		Cs_ppm_m133	1.227	1.23	1.206	1.18	1.169	1.176	1.173	1.142	1.149	1.186	1.25	1.137	1.165	1.198		Cs_ppm_m133	1.04071	1.04326	1.0229	1.00085	0.991518	0.997455	0.994911	0.968617	0.974555	1.00594	1.06022	0.964377	0.988126	1.01612	1.00497		1.18486	0.0339453	2.86493
			Cs_ppm_m133_Int2SE	0.091	0.085	0.083	0.065	0.064	0.072	0.074	0.075	0.064	0.06	0.08	0.064	0.072	0.059
Ba	670		Ba_ppm_m137	676	667	689	679	678	666	689	678	661	678	670	667	664	693		Ba_ppm_m137	1.00896	0.995522	1.02836	1.01343	1.01194	0.99403	1.02836	1.01194	0.986567	1.01194	1	0.995522	0.991045	1.03433	1.008		675.357	10.0354	1.48594
			Ba_ppm_m137_Int2SE	31	20	23	23	24	32	24	28	30	27	26	24	33	30
La	24.42		La_ppm_m139	24.7	24.58	25.04	24.94	24.83	24.5	24.48	24.7	23.99	24.27	24.06	24.45	24.6	24.91		La_ppm_m139	1.01147	1.00655	1.02539	1.02129	1.01679	1.00328	1.00246	1.01147	0.982391	0.993857	0.985258	1.00123	1.00737	1.02007	1.00635		24.575	0.31493	1.2815
			La_ppm_m139_Int2SE	1	0.76	0.72	0.79	0.83	1.1	0.92	1	0.85	0.91	0.8	0.83	1.2	0.92
Ce	50.974		Ce_ppm_m140	51.6	51.7	52.2	51.1	50.4	50.8	51.6	50.9	50.5	51.2	52.5	50.7	51.8	52.2		Ce_ppm_m140	1.01228	1.01424	1.02405	1.00247	0.988739	0.996586	1.01228	0.998548	0.990701	1.00443	1.02994	0.994625	1.0162	1.02405	1.0078		51.3714	0.670738	1.30566
			Ce_ppm_m140_Int2SE	2	1.6	1.6	1.5	1.5	2.4	1.8	1.5	1.7	1.9	2	1.7	2.3	1.9
Pr	6.463		Pr_ppm_m141	6.45	6.57	6.61	6.4	6.56	6.37	6.62	6.44	6.32	6.6	6.31	6.28	6.46	6.8		Pr_ppm_m141	0.997989	1.01656	1.02274	0.990252	1.01501	0.98561	1.02429	0.996441	0.977874	1.0212	0.976327	0.971685	0.999536	1.05214	1.0034		6.485	0.147635	2.27656
			Pr_ppm_m141_Int2SE	0.31	0.24	0.3	0.27	0.23	0.33	0.3	0.42	0.22	0.26	0.29	0.31	0.29	0.34
Nd	27.725		Nd_ppm_m146	28	27.1	28.7	27.3	27.5	27.2	27.4	27.3	27.3	28.4	28.1	27.6	28.4	28.9		Nd_ppm_m146	1.00992	0.977457	1.03517	0.984671	0.991885	0.981064	0.988278	0.984671	0.984671	1.02435	1.01353	0.995491	1.02435	1.04238	1.00271		27.8	0.605106	2.17664
			Nd_ppm_m146_Int2SE	1.5	1.3	1.1	1.1	1.2	1.7	1.2	1.2	1.4	1.2	1.2	1.3	1.7	1.5
Sm	6.438		Sm_ppm_m147	6.45	6.59	6.46	6.53	6.29	6.72	6.45	6.42	6.29	6.17	6.74	6.37	6.61	6.6		Sm_ppm_m147	1.00186	1.02361	1.00342	1.01429	0.977011	1.0438	1.00186	0.997204	0.977011	0.958372	1.04691	0.989438	1.02672	1.02516	1.00619		6.47786	0.16577	2.55902
			Sm_ppm_m147_Int2SE	0.49	0.41	0.47	0.34	0.46	0.45	0.43	0.42	0.36	0.44	0.51	0.58	0.53	0.43
Eu	1.919		Eu_ppm_m153	1.83	1.9	1.87	1.82	1.94	1.89	1.92	1.88	1.82	1.91	1.97	1.82	1.88	1.94		Eu_ppm_m153	0.953622	0.990099	0.974466	0.948411	1.01094	0.984888	1.00052	0.979677	0.948411	0.99531	1.02658	0.948411	0.979677	1.01094	0.982282		1.885	0.0491074	2.60517
			Eu_ppm_m153_Int2SE	0.11	0.13	0.12	0.13	0.11	0.13	0.15	0.14	0.12	0.13	0.19	0.12	0.14	0.16
Gd	6.36		Gd_ppm_m157	6.11	6.47	6.65	6.85	6.52	5.9	6.33	6.7	6.65	6.21	6.23	6.41	6.2	6.81		Gd_ppm_m157	0.960692	1.0173	1.0456	1.07704	1.02516	0.927673	0.995283	1.05346	1.0456	0.976415	0.97956	1.00786	0.974843	1.07075	1.01123		6.43143	0.282185	4.3876
			Gd_ppm_m157_Int2SE	0.45	0.49	0.39	0.51	0.45	0.37	0.44	0.51	0.5	0.41	0.53	0.48	0.44	0.48
Tb	0.983		Tb_ppm_m159	0.973	1.012	1.015	1.014	0.999	1	0.996	0.951	0.997	0.99	0.905	1.008	1.004	0.958		Tb_ppm_m159	0.989827	1.0295	1.03255	1.03154	1.01628	1.01729	1.01322	0.967447	1.01424	1.00712	0.920651	1.02543	1.02136	0.974568	1.00436		0.987286	0.0309178	3.1316
			Tb_ppm_m159_Int2SE	0.068	0.062	0.057	0.067	0.065	0.09	0.065	0.077	0.063	0.069	0.067	0.065	0.08	0.081
Dy	6.087		Dy_ppm_m163	6.07	6.24	6.14	6.36	6.12	6.3	5.85	6.28	6.27	6.26	6.32	5.92	6.32	6.5		Dy_ppm_m163	0.997207	1.02514	1.00871	1.04485	1.00542	1.03499	0.961065	1.03171	1.03006	1.02842	1.03828	0.972564	1.03828	1.06785	1.02032		6.21071	0.174773	2.81406
			Dy_ppm_m163_Int2SE	0.4	0.4	0.44	0.45	0.38	0.46	0.36	0.42	0.47	0.47	0.39	0.3	0.54	0.43
Ho	1.248		Ho_ppm_m165	1.296	1.271	1.37	1.31	1.307	1.254	1.19	1.271	1.18	1.302	1.18	1.245	1.22	1.34		Ho_ppm_m165	1.03846	1.01843	1.09776	1.04968	1.04728	1.00481	0.953526	1.01843	0.945513	1.04327	0.945513	0.997596	0.977564	1.07372	1.01511		1.26686	0.0591047	4.66546
			Ho_ppm_m165_Int2SE	0.079	0.077	0.09	0.1	0.07	0.097	0.07	0.089	0.11	0.086	0.1	0.09	0.11	0.1
Er	3.524		Er_ppm_m166	3.46	3.46	3.64	3.81	3.55	3.68	3.33	3.63	3.57	3.38	3.43	3.49	3.38	3.58		Er_ppm_m166	0.981839	0.981839	1.03292	1.08116	1.00738	1.04427	0.944949	1.03008	1.01305	0.959137	0.973326	0.990352	0.959137	1.01589	1.00109		3.52786	0.134117	3.80166
			Er_ppm_m166_Int2SE	0.26	0.23	0.22	0.27	0.3	0.31	0.26	0.28	0.26	0.22	0.33	0.25	0.32	0.25
Tm	0.488		Tm_ppm_m169	0.531	0.46	0.505	0.523	0.497	0.464	0.449	0.483	0.465	0.51	0.494	0.492	0.478	0.455		Tm_ppm_m169	1.08811	0.942623	1.03484	1.07172	1.01844	0.95082	0.920082	0.989754	0.952869	1.04508	1.0123	1.0082	0.979508	0.932377	0.996194		0.486143	0.0256541	5.27707
			Tm_ppm_m169_Int2SE	0.044	0.04	0.045	0.045	0.041	0.037	0.042	0.036	0.053	0.056	0.051	0.053	0.055	0.048
Yb	3.328		Yb_ppm_m172	3.45	3.46	3.59	3.55	3.49	3.1	3.47	3.43	3.43	3.56	3.3	3.3	3.19	3.61		Yb_ppm_m172	1.03666	1.03966	1.07873	1.06671	1.04868	0.93149	1.04267	1.03065	1.03065	1.06971	0.991587	0.991587	0.958534	1.08474	1.02872		3.42357	0.150773	4.40396
			Yb_ppm_m172_Int2SE	0.33	0.31	0.33	0.3	0.29	0.3	0.23	0.27	0.32	0.31	0.31	0.25	0.3	0.33
Lu	0.485		Lu_ppm_m175	0.516	0.475	0.534	0.439	0.496	0.496	0.514	0.538	0.476	0.476	0.495	0.461	0.492	0.509		Lu_ppm_m175	1.06392	0.979381	1.10103	0.905155	1.02268	1.02268	1.05979	1.10928	0.981443	0.981443	1.02062	0.950515	1.01443	1.04948	1.0187		0.494071	0.0274295	5.55173
			Lu_ppm_m175_Int2SE	0.06	0.048	0.05	0.047	0.05	0.054	0.05	0.049	0.049	0.063	0.051	0.046	0.059	0.053
Hf	4.721		Hf_ppm_m177	4.73	4.78	4.88	5.21	4.71	4.58	5.17	4.97	4.76	5.14	4.96	4.88	4.66	4.94		Hf_ppm_m177	1.00191	1.0125	1.03368	1.10358	0.99767	0.970133	1.09511	1.05274	1.00826	1.08875	1.05062	1.03368	0.987079	1.04639	1.03444		4.88357	0.194683	3.9865
			Hf_ppm_m177_Int2SE	0.28	0.32	0.31	0.28	0.34	0.36	0.4	0.31	0.3	0.4	0.41	0.37	0.34	0.39
Ta	0.72		Ta_ppm_m181	0.674	0.724	0.729	0.709	0.677	0.706	0.649	0.719	0.704	0.628	0.704	0.731	0.738	0.801		Ta_ppm_m181	0.936111	1.00556	1.0125	0.984722	0.940278	0.980556	0.901389	0.998611	0.977778	0.872222	0.977778	1.01528	1.025	1.1125	0.981448		0.706643	0.0419755	5.94012
			Ta_ppm_m181_Int2SE	0.065	0.054	0.061	0.055	0.069	0.089	0.057	0.064	0.085	0.069	0.059	0.065	0.071	0.078
W	0.521		W_ppm_m182	0.556	0.469	0.488	0.538	0.516	0.526	0.514	0.496	0.486	0.458	0.474	0.469	0.59	0.493		W_ppm_m182	1.06718	0.900192	0.93666	1.03263	0.990403	1.0096	0.986564	0.952015	0.932821	0.879079	0.909789	0.900192	1.13244	0.946257	0.969701		0.505214	0.0374108	7.40493
			W_ppm_m182_Int2SE	0.083	0.085	0.067	0.086	0.06	0.073	0.078	0.076	0.077	0.072	0.09	0.063	0.1	0.072
Tl	0.201		Tl_ppm_m205	0.244	0.233	0.246	0.263	0.262	0.23	0.245	0.25	0.24	0.219	0.278	0.26	0.267	0.246		Tl_ppm_m205	1.21393	1.1592	1.22388	1.30846	1.30348	1.14428	1.21891	1.24378	1.19403	1.08955	1.38308	1.29353	1.32836	1.22388	1.23774		0.248786	0.0159527	6.41223		Tl can be be inhomogenouse in BCR-2G (see Jenner & O'Neill, 2012)
			Tl_ppm_m205_Int2SE	0.029	0.028	0.026	0.028	0.028	0.033	0.033	0.028	0.032	0.03	0.034	0.036	0.034	0.033
Pb	9.959		Pb_ppm_m208	11.09	10.66	10.23	10.62	10.71	11.25	10.9	11.01	10.83	10.85	11.03	10.72	10.79	10.48		Pb_ppm_m208	1.11357	1.07039	1.02721	1.06637	1.07541	1.12963	1.09449	1.10553	1.08746	1.08947	1.10754	1.07641	1.08344	1.05231	1.08423		10.7979	0.261774	2.42432
			Pb_ppm_m208_Int2SE	0.62	0.39	0.41	0.49	0.48	0.52	0.41	0.55	0.48	0.42	0.6	0.39	0.53	0.4
Bi	0.0495337		Bi_ppm_m209	0.0364	0.0294	0.046	0.0349	0.035	0.039	0.046	0.0241	0.049	0.039	0.043	0.039	0.033	0.0289		Bi_ppm_m209	0.734853	0.593535	0.928661	0.704571	0.70659	0.787343	0.928661	0.486537	0.989225	0.787343	0.868096	0.787343	0.666213	0.583441	0.753744		0.0373357	0.00716279	19.1848		Bi can be be inhomogenouse in BCR-2G (see Jenner & O'Neill, 2012)
			Bi_ppm_m209_Int2SE	0.0091	0.0085	0.01	0.0092	0.012	0.012	0.012	0.0087	0.013	0.012	0.013	0.012	0.01	0.0099
Th	5.8		Th_ppm_m232	5.75	5.9	6.28	5.84	6.14	5.83	5.75	5.81	5.71	5.67	6.02	5.62	5.83	5.8		Th_ppm_m232	0.991379	1.01724	1.08276	1.0069	1.05862	1.00517	0.991379	1.00172	0.984483	0.977586	1.03793	0.968966	1.00517	1	1.00924		5.85357	0.181896	3.10744
			Th_ppm_m232_Int2SE	0.26	0.23	0.26	0.25	0.26	0.36	0.31	0.3	0.34	0.25	0.3	0.26	0.31	0.28
U	1.72		U_ppm_m238	1.7	1.66	1.78	1.65	1.641	1.67	1.63	1.77	1.67	1.66	1.74	1.57	1.65	1.73		U_ppm_m238	0.988372	0.965116	1.03488	0.959302	0.95407	0.97093	0.947674	1.02907	0.97093	0.965116	1.01163	0.912791	0.959302	1.00581	0.976786		1.68007	0.0578599	3.44389
			U_ppm_m238_Int2SE	0.12	0.1	0.13	0.1	0.09	0.11	0.12	0.12	0.11	0.11	0.13	0.11	0.12	0.1
																			Th/U	1.00304	1.05401	1.04626	1.04961	1.10958	1.03527	1.04612	0.973427	1.01396	1.01292	1.026	1.06154	1.04782	0.99422	1.03322

## Sheet: 12_03_24_Batch2_OU1_50mu
	29Si Internal Standard		Iolite Input
			Date	2024-03-12	2024-03-12	2024-03-12	2024-03-12	2024-03-12	2024-03-12	2024-03-12	2024-03-12	2024-03-12	2024-03-12
			Duration(s)	22.107	23.119	22.967	22.75	21.208	22.002	21.476	20.459	21.322	21.317
			Comments	BCR-1	BCR-2	BCR-3	BCR-4	BCR-5	BCR-6	BCR-7	BCR-8	BCR-9	BCR-10
			IntStd (wt% Oxide)	54.4	54.4	54.4	54.4	54.4	54.4	54.4	54.4	54.4	54.4		Measured/Prefered Values													Average - STDEV - RSD
Pref Values
BCR-2G (ppm)																BCR-1	BCR-2	BCR-3	BCR-4	BCR-5	BCR-6	BCR-7	BCR-8	BCR-9	BCR-10	AVERAGE		Average	STDEV	RSD
Li	9.374		Li_ppm_m7	8.93	8.73	9.7	9.57	9.45	9.71	8.65	9.02	8.46	9.12		Li_ppm_m7	0.952635	0.931299	1.03478	1.02091	1.00811	1.03584	0.922765	0.962236	0.902496	0.972904	0.974397		9.134	0.453216	4.96185
			Li_ppm_m7_Int2SE	0.56	0.54	0.59	0.54	0.44	0.61	0.62	0.67	0.52	0.6
Be	2.097		Be_ppm_m9	1.85	1.6	2.14	2.17	2.18	1.86	2.47	2.37	2.22	2.12		Be_ppm_m9	0.882213	0.762995	1.02051	1.03481	1.03958	0.886981	1.17787	1.13019	1.05866	1.01097	1.00048		2.098	0.25982	12.3842
			Be_ppm_m9_Int2SE	0.44	0.45	0.58	0.49	0.52	0.33	0.73	0.5	0.58	0.52
Sc	34.046		Sc_ppm_m45	32.4	32.9	34.2	35.7	34.9	36.7	34.5	34.1	33.4	33.3		Sc_ppm_m45	0.951654	0.96634	1.00452	1.04858	1.02508	1.07795	1.01333	1.00159	0.981026	0.978088	1.00482		34.21	1.31102	3.83228
			Sc_ppm_m45_Int2SE	1.8	2	2	1.3	1.6	2.1	1.8	2.3	1.8	1.7
V	436.642		V_ppm_m51	419	410	434	435	433	462	441	444	421	429		V_ppm_m51	0.959596	0.938984	0.993949	0.996239	0.991659	1.05808	1.00998	1.01685	0.964177	0.982498	0.991201		432.8	14.5892	3.37088
			V_ppm_m51_Int2SE	24	21	21	18	16	28	25	28	19	22
Cr	16.065		Cr_ppm_m53	15.1	17.4	17.2	15.8	15.1	17.2	14.7	16.5	16.9	17.2		Cr_ppm_m53	0.939932	1.0831	1.07065	0.983505	0.939932	1.07065	0.915033	1.02708	1.05198	1.07065	1.01525		16.31	1.03971	6.37469
			Cr_ppm_m53_Int2SE	1.6	2.2	1.8	1.5	1.8	2.1	1.5	1.7	1.8	1.5
Co	38.11		Co_ppm_m59	37.2	38.9	38	39.5	37.7	37.4	37.3	36.8	37.3	37.3		Co_ppm_m59	0.976122	1.02073	0.997114	1.03647	0.989242	0.98137	0.978746	0.965626	0.978746	0.978746	0.990291		37.74	0.842219	2.23164
			Co_ppm_m59_Int2SE	1.4	2	1.9	1.5	1	2	1.4	2	1.5	1.6
Ni	12.224		Ni_ppm_m60	10.61	11.7	12.1	12.1	11.4	11.7	12.2	12.7	11.8	13.1		Ni_ppm_m60	0.867965	0.957134	0.989856	0.989856	0.932592	0.957134	0.998037	1.03894	0.965314	1.07166	0.976849		11.941	0.686156	5.74622
			Ni_ppm_m60_Int2SE	0.95	1.1	1.1	1.1	1.2	1	1.1	1.1	1.1	1.2
Cu	18.358		Cu_ppm_m65	16.5	16.2	16.9	18.5	17.5	14.4	17.9	17	17.4	17.1		Cu_ppm_m65	0.898791	0.882449	0.92058	1.00774	0.953263	0.784399	0.975052	0.926027	0.947816	0.931474	0.922758		16.94	1.11076	6.557
			Cu_ppm_m65_Int2SE	1.5	1.2	1.5	1.4	1.3	1.5	1.9	1.4	1.4	1.6
Zn	154.298		Zn_ppm_m66	153.6	149.1	155	157.4	146.6	149	156.5	140	154.3	155.9		Zn_ppm_m66	0.995476	0.966312	1.00455	1.0201	0.95011	0.965664	1.01427	0.907335	1.00001	1.01038	0.983422		151.74	5.49104	3.61872
			Zn_ppm_m66_Int2SE	7.8	7.6	7	6.5	6.4	9.2	8.1	13	8.5	7.1
Ga	21.537		Ga_ppm_m71	20.7	21.3	21.1	21.7	21.07	22.4	21.8	19.5	21.4	21.47		Ga_ppm_m71	0.961137	0.988996	0.979709	1.00757	0.978316	1.04007	1.01221	0.905419	0.993639	0.996889	0.986396		21.244	0.768869	3.61923
			Ga_ppm_m71_Int2SE	1.3	1.1	1.1	1.1	0.96	1.6	1.3	1.2	1.2	0.91
Ge	1.81		Ge_ppm_m74	1.9	1.83	1.91	1.41	2.12	1.86	1.86	1.88	1.8	1.77		Ge_ppm_m74	1.04972	1.01105	1.05525	0.779006	1.17127	1.02762	1.02762	1.03867	0.994475	0.977901	1.01326		1.834	0.176522	9.62497
			Ge_ppm_m74_Int2SE	0.49	0.61	0.53	0.43	0.47	0.41	0.41	0.54	0.43	0.43
Rb	48.09		Rb_ppm_m85	47.6	45.6	46	45.4	46.5	48.6	47.6	45.5	46.8	46.9		Rb_ppm_m85	0.989811	0.948222	0.95654	0.944063	0.966937	1.01061	0.989811	0.946143	0.973175	0.975255	0.970056		46.65	1.06066	2.27366
			Rb_ppm_m85_Int2SE	2.2	1.5	2.3	1.8	2.2	2.9	2.2	2.3	2.3	2.4
Sr	340.328		Sr_ppm_m88	327	334	332	337	338	352	339	344	327	341		Sr_ppm_m88	0.960838	0.981406	0.975529	0.990221	0.99316	1.0343	0.996098	1.01079	0.960838	1.00197	0.990515		337.1	7.66594	2.27409
			Sr_ppm_m88_Int2SE	16	17	15	12	13	17	15	21	17	17
Y	32.605		Y_ppm_m89	32.7	32.9	32.5	33.3	32.2	33.1	33	34	33	32.5		Y_ppm_m89	1.00291	1.00905	0.99678	1.02132	0.987579	1.01518	1.01211	1.04278	1.01211	0.99678	1.00966		32.92	0.502881	1.52758
			Y_ppm_m89_Int2SE	1.7	1.7	1.7	1.3	1.3	1.8	1.5	2	1.7	1.6
Zr	175.087		Zr_ppm_m90	170.3	173.9	180.9	176.3	176.1	181	174.4	182	173.8	174.8		Zr_ppm_m90	0.972659	0.993221	1.0332	1.00693	1.00579	1.03377	0.996076	1.03948	0.992649	0.998361	1.00721		176.35	3.7951	2.15203
			Zr_ppm_m90_Int2SE	8.1	8.2	9.1	6.3	6.9	10	8.2	10	7.9	9
Nb	12.117		Nb_ppm_m93	11.76	11.71	12.24	12.1	11.79	12.14	11.77	11.97	11.6	11.81		Nb_ppm_m93	0.970537	0.966411	1.01015	0.998597	0.973013	1.0019	0.971363	0.987868	0.957333	0.974664	0.981183		11.889	0.210737	1.77254
			Nb_ppm_m93_Int2SE	0.67	0.67	0.58	0.41	0.54	0.69	0.53	0.74	0.55	0.57
Mo	250.491		Mo_ppm_m95	255	259	268	272	257	270	261	251	261	257		Mo_ppm_m95	1.018	1.03397	1.0699	1.08587	1.02598	1.07788	1.04195	1.00203	1.04195	1.02598	1.04235		261.1	6.85484	2.62537
			Mo_ppm_m95_Int2SE	12	11	13	12	10	14	11	15	10	11
Cd	0.203432		Cd_ppm_m111	0.24	Below LOD	0.25	0.18	Below LOD	0.07	0.14	Below LOD	0.12	0.16		Cd_ppm_m111	1.17976	#VALUE!	1.22891	0.884818	#VALUE!	0.344096	0.688192	#VALUE!	0.589879	0.786505	0.814594		0.165714	0.064254	38.7739		Cd concentrations in BCR-2G close or at DL with 50µm spot size
			Cd_ppm_m111_Int2SE	0.16	Below LOD	0.17	0.11	Below LOD	0.083	0.11	Below LOD	0.096	0.12
In	0.0980432		In_ppm_m115_corrected	0.093458	0.08786	0.087642	0.07386	0.100656	0.090574	0.093758	0.110336	0.03903	0.087928		In_ppm_m115	0.953233	0.896136	0.893912	0.753342	1.02665	0.923818	0.956293	1.12538	0.39809	0.896829	0.882368		0.0865102	0.0191619	22.1499		In can be be inhomogenouse in BCR-2G (see Jenner & O'Neill, 2012)
			In_ppm_m115_Int2SE	0.026	0.03	0.02	0.029	0.029	0.026	0.026	0.032	0.022	0.027
Sn	2.074		Sn_ppm_m118	1.63	2.1	1.87	2.1	2.16	1.89	2.13	1.96	2.05	2.08		Sn_ppm_m118	0.785921	1.01254	0.901639	1.01254	1.04147	0.911283	1.027	0.945034	0.988428	1.00289	0.962874		1.997	0.162894	8.15693
			Sn_ppm_m118_Int2SE	0.22	0.19	0.25	0.23	0.28	0.24	0.22	0.25	0.2	0.28
Sb	0.321		Sb_ppm_m121	0.237	0.251	0.342	0.274	0.277	0.248	0.292	0.259	0.316	0.272		Sb_ppm_m121	0.738318	0.781931	1.06542	0.853583	0.862928	0.772586	0.909657	0.806854	0.984424	0.847352	0.862305		0.2768	0.0323962	11.7038
			Sb_ppm_m121_Int2SE	0.04	0.052	0.065	0.054	0.059	0.066	0.065	0.047	0.063	0.049
Cs	1.179		Cs_ppm_m133	1.106	1.134	1.167	1.195	1.189	1.148	1.245	1.17	1.123	1.119		Cs_ppm_m133	0.938083	0.961832	0.989822	1.01357	1.00848	0.973707	1.05598	0.992366	0.952502	0.949109	0.983545		1.1596	0.0424583	3.66146
			Cs_ppm_m133_Int2SE	0.061	0.08	0.084	0.059	0.07	0.092	0.073	0.1	0.076	0.066
Ba	670		Ba_ppm_m137	666	654	679	665	669	699	675	662	634	668		Ba_ppm_m137	0.99403	0.976119	1.01343	0.992537	0.998507	1.04328	1.00746	0.98806	0.946269	0.997015	0.995672		667.1	16.7495	2.51079
			Ba_ppm_m137_Int2SE	30	29	32	21	26	42	30	33	26	30
La	24.42		La_ppm_m139	24.2	24.03	25.03	24.94	24.06	24.6	24.9	24.1	24.04	24.33		La_ppm_m139	0.990991	0.984029	1.02498	1.02129	0.985258	1.00737	1.01966	0.986896	0.984439	0.996314	1.00012		24.423	0.406914	1.66611
			La_ppm_m139_Int2SE	0.9	0.86	0.95	0.72	0.86	1.1	1.1	0.96	0.97	0.89
Ce	50.974		Ce_ppm_m140	48.8	49.3	51.1	50.8	50.6	53.4	52.1	50.5	49.7	51.9		Ce_ppm_m140	0.957351	0.96716	1.00247	0.996586	0.992663	1.04759	1.02209	0.990701	0.975007	1.01817	0.996979		50.82	1.38788	2.73098
			Ce_ppm_m140_Int2SE	1.7	1.6	1.7	1.5	1.8	2.2	2	1.8	1.9	1.9
Pr	6.463		Pr_ppm_m141	6.45	6.38	6.29	6.37	6.38	6.49	6.38	6.18	6.27	6.49		Pr_ppm_m141	0.997989	0.987158	0.973232	0.98561	0.987158	1.00418	0.987158	0.956212	0.970138	1.00418	0.985301		6.368	0.0988602	1.55245
			Pr_ppm_m141_Int2SE	0.3	0.34	0.26	0.24	0.29	0.28	0.3	0.32	0.34	0.28
Nd	27.725		Nd_ppm_m146	27.2	27.4	28	28.1	27.9	28.7	27.8	26.8	26.8	27.2		Nd_ppm_m146	0.981064	0.988278	1.00992	1.01353	1.00631	1.03517	1.00271	0.966637	0.966637	0.981064	0.995131		27.59	0.613641	2.22414
			Nd_ppm_m146_Int2SE	1.3	1.3	1.4	1.3	1.3	1.5	1.3	1.5	1.7	1.2
Sm	6.438		Sm_ppm_m147	6.3	6.28	6.47	7.12	6.44	6.67	6.16	6.44	6.18	6.6		Sm_ppm_m147	0.978565	0.975458	1.00497	1.10593	1.00031	1.03604	0.956819	1.00031	0.959925	1.02516	1.00435		6.466	0.284066	4.39322
			Sm_ppm_m147_Int2SE	0.48	0.55	0.42	0.43	0.42	0.55	0.49	0.5	0.4	0.48
Eu	1.919		Eu_ppm_m153	1.93	1.88	1.99	1.97	2.05	1.96	1.92	1.93	1.88	1.91		Eu_ppm_m153	1.00573	0.979677	1.037	1.02658	1.06826	1.02137	1.00052	1.00573	0.979677	0.99531	1.01199		1.942	0.0522388	2.68995
			Eu_ppm_m153_Int2SE	0.16	0.15	0.18	0.13	0.15	0.16	0.15	0.19	0.14	0.13
Gd	6.36		Gd_ppm_m157	6.35	5.79	6.61	5.98	6.22	6.64	6.94	6.53	6.39	6.59		Gd_ppm_m157	0.998428	0.910377	1.03931	0.940252	0.977987	1.04403	1.09119	1.02673	1.00472	1.03616	1.00692		6.404	0.338237	5.28166
			Gd_ppm_m157_Int2SE	0.48	0.57	0.53	0.36	0.49	0.62	0.42	0.56	0.57	0.62
Tb	0.983		Tb_ppm_m159	0.929	0.975	0.953	1.009	1.015	1.06	0.967	1.02	0.909	0.969		Tb_ppm_m159	0.945066	0.991862	0.969481	1.02645	1.03255	1.07833	0.983723	1.03764	0.92472	0.985758	0.997558		0.9806	0.0456416	4.65446
			Tb_ppm_m159_Int2SE	0.064	0.077	0.058	0.082	0.082	0.11	0.073	0.11	0.08	0.078
Dy	6.087		Dy_ppm_m163	6.09	5.92	6.23	6.26	5.58	5.84	6.4	6.1	5.87	6.02		Dy_ppm_m163	1.00049	0.972564	1.02349	1.02842	0.916708	0.959422	1.05142	1.00214	0.96435	0.988993	0.9908		6.031	0.23914	3.96517
			Dy_ppm_m163_Int2SE	0.38	0.32	0.36	0.39	0.35	0.42	0.36	0.49	0.36	0.26
Ho	1.248		Ho_ppm_m165	1.248	1.18	1.19	1.242	1.201	1.34	1.316	1.302	1.241	1.245		Ho_ppm_m165	1	0.945513	0.953526	0.995192	0.96234	1.07372	1.05449	1.04327	0.994391	0.997596	1.002		1.2505	0.0539882	4.31733
			Ho_ppm_m165_Int2SE	0.089	0.1	0.096	0.089	0.087	0.1	0.082	0.09	0.087	0.082
Er	3.524		Er_ppm_m166	3.66	3.49	3.33	3.59	3.68	3.63	3.48	3.35	3.49	3.58		Er_ppm_m166	1.03859	0.990352	0.944949	1.01873	1.04427	1.03008	0.987514	0.950624	0.990352	1.01589	1.00114		3.528	0.12182	3.45293
			Er_ppm_m166_Int2SE	0.31	0.2	0.25	0.26	0.24	0.32	0.28	0.28	0.25	0.29
Tm	0.488		Tm_ppm_m169	0.461	0.477	0.478	0.461	0.478	0.483	0.478	0.448	0.489	0.49		Tm_ppm_m169	0.944672	0.977459	0.979508	0.944672	0.979508	0.989754	0.979508	0.918033	1.00205	1.0041	0.971926		0.4743	0.0134664	2.83922
			Tm_ppm_m169_Int2SE	0.053	0.032	0.06	0.047	0.044	0.059	0.052	0.056	0.05	0.059
Yb	3.328		Yb_ppm_m172	3.07	3.31	3.42	3.34	3.39	3.55	3.34	3.29	3.27	3.37		Yb_ppm_m172	0.922476	0.994591	1.02764	1.00361	1.01863	1.06671	1.00361	0.988582	0.982572	1.01262	1.0021		3.335	0.122406	3.67036
			Yb_ppm_m172_Int2SE	0.33	0.24	0.36	0.32	0.25	0.28	0.28	0.3	0.33	0.29
Lu	0.485		Lu_ppm_m175	0.505	0.505	0.51	0.492	0.503	0.554	0.507	0.536	0.453	0.484		Lu_ppm_m175	1.04124	1.04124	1.05155	1.01443	1.03711	1.14227	1.04536	1.10515	0.934021	0.997938	1.04103		0.5049	0.0273026	5.40753
			Lu_ppm_m175_Int2SE	0.055	0.056	0.063	0.041	0.05	0.055	0.047	0.064	0.044	0.055
Hf	4.721		Hf_ppm_m177	4.6	4.63	4.76	4.88	4.77	4.67	4.88	4.88	4.45	5.03		Hf_ppm_m177	0.97437	0.980724	1.00826	1.03368	1.01038	0.989197	1.03368	1.03368	0.942597	1.06545	1.0072		4.755	0.170831	3.59267
			Hf_ppm_m177_Int2SE	0.33	0.31	0.34	0.39	0.37	0.37	0.39	0.34	0.29	0.37
Ta	0.72		Ta_ppm_m181	0.689	0.721	0.761	0.749	0.761	0.74	0.706	0.687	0.684	0.775		Ta_ppm_m181	0.956944	1.00139	1.05694	1.04028	1.05694	1.02778	0.980556	0.954167	0.95	1.07639	1.01014		0.7273	0.0343804	4.72713
			Ta_ppm_m181_Int2SE	0.06	0.071	0.063	0.08	0.073	0.064	0.066	0.081	0.056	0.069
W	0.521		W_ppm_m182	0.57	0.508	0.584	0.566	0.539	0.566	0.464	0.472	0.469	0.456		W_ppm_m182	1.09405	0.975048	1.12092	1.08637	1.03455	1.08637	0.890595	0.90595	0.900192	0.87524	0.996929		0.5194	0.0510625	9.83105
			W_ppm_m182_Int2SE	0.095	0.073	0.073	0.086	0.074	0.072	0.067	0.073	0.071	0.074
Tl	0.201		Tl_ppm_m205	0.233	0.23	0.243	0.229	0.214	0.241	0.235	0.251	0.25	0.254		Tl_ppm_m205	1.1592	1.14428	1.20896	1.1393	1.06468	1.199	1.16915	1.24876	1.24378	1.26368	1.18408		0.238	0.0122837	5.16121		Tl can be be inhomogenouse in BCR-2G (see Jenner & O'Neill, 2012)
			Tl_ppm_m205_Int2SE	0.03	0.034	0.028	0.03	0.022	0.03	0.025	0.034	0.025	0.033
Pb	9.959		Pb_ppm_m208	10.58	10.3	10.21	10.38	10.24	11.06	10.28	10.15	9.91	10.25		Pb_ppm_m208	1.06236	1.03424	1.0252	1.04227	1.02822	1.11055	1.03223	1.01918	0.99508	1.02922	1.03786		10.336	0.305258	2.95334
			Pb_ppm_m208_Int2SE	0.58	0.5	0.56	0.39	0.46	0.57	0.5	0.6	0.47	0.45
Bi	0.0495337		Bi_ppm_m209	0.0398	0.043	0.044	0.032	0.031	0.04	0.0327	0.029	0.036	0.036		Bi_ppm_m209	0.803493	0.868096	0.888284	0.646025	0.625836	0.807531	0.660157	0.58546	0.726778	0.726778	0.733844		0.03635	0.00519727	14.2979		Bi can be be inhomogenouse in BCR-2G (see Jenner & O'Neill, 2012)
			Bi_ppm_m209_Int2SE	0.0097	0.014	0.011	0.012	0.01	0.013	0.0092	0.011	0.0093	0.012
Th	5.8		Th_ppm_m232	5.67	5.67	5.98	6.04	5.71	6.07	5.78	5.66	5.46	5.8		Th_ppm_m232	0.977586	0.977586	1.03103	1.04138	0.984483	1.04655	0.996552	0.975862	0.941379	1	0.997241		5.784	0.193747	3.3497
			Th_ppm_m232_Int2SE	0.25	0.23	0.26	0.27	0.25	0.32	0.29	0.32	0.28	0.32
U	1.72		U_ppm_m238	1.58	1.7	1.64	1.696	1.61	1.62	1.64	1.61	1.66	1.72		U_ppm_m238	0.918605	0.988372	0.953488	0.986047	0.936047	0.94186	0.953488	0.936047	0.965116	1	0.957907		1.6476	0.0456538	2.77093
			U_ppm_m238_Int2SE	0.11	0.12	0.11	0.082	0.1	0.11	0.11	0.12	0.12	0.11
															Th/U	1.06421	0.989087	1.08133	1.05612	1.05175	1.11115	1.04516	1.04254	0.975405	1	1.04106

## Sheet: 13_03_24_Batch2_OU1_50mu
	29Si Internal Standard		Iolite Input
			Date	2024-03-13	2024-03-13	2024-03-13	2024-03-13	2024-03-13	2024-03-13	2024-03-13	2024-03-13	2024-03-13	2024-03-13
			Duration(s)	23.895	23.905	22.086	22.65	21.311	22.981	20.875	21.837	22.813	23.023
			Comments	BCR-1	BCR-2	BCR-3	BCR-4	BCR-5	BCR-6	BCR-7	BCR-8	BCR-9	BCR-10
			IntStd (wt% Oxide)	54.4	54.4	54.4	54.4	54.4	54.4	54.4	54.4	54.4	54.4		Measured/Prefered Values													Average - STDEV - RSD
Pref Values
BCR-2G (ppm)																BCR-1	BCR-2	BCR-3	BCR-4	BCR-5	BCR-6	BCR-7	BCR-8	BCR-9	BCR-10	AVERAGE		Average	STDEV	RSD
Li	9.374		Li_ppm_m7	9.18	9.04	10.01	8.91	8.93	9.43	9.12	9.35	9.28	9.55		Li_ppm_m7	0.979304	0.96437	1.06785	0.950501	0.952635	1.00597	0.972904	0.99744	0.989972	1.01878	0.989972		9.28	0.330958	3.56636
			Li_ppm_m7_Int2SE	0.63	0.56	0.53	0.5	0.48	0.62	0.5	0.39	0.54	0.48
Be	2.097		Be_ppm_m9	2.6	2.28	2.02	1.94	2.62	1.93	2.23	2.6	2.38	2.04		Be_ppm_m9	1.23987	1.08727	0.963281	0.925131	1.2494	0.920362	1.06342	1.23987	1.13495	0.972818	1.07964		2.264	0.277617	12.2622
			Be_ppm_m9_Int2SE	0.52	0.54	0.56	0.44	0.52	0.51	0.55	0.63	0.6	0.53
Sc	34.046		Sc_ppm_m45	36.5	36.7	35.1	34.5	35	34.7	34.5	34.7	34	34.2		Sc_ppm_m45	1.07208	1.07795	1.03096	1.01333	1.02802	1.01921	1.01333	1.01921	0.998649	1.00452	1.02773		34.99	0.910982	2.60355
			Sc_ppm_m45_Int2SE	1.7	1.6	2.1	1.4	1.5	1.8	1.7	1.8	1.8	1.5
V	436.642		V_ppm_m51	461	445	452	432	450	439	438	427	439	428		V_ppm_m51	1.05578	1.01914	1.03517	0.989369	1.03059	1.0054	1.00311	0.977918	1.0054	0.980208	1.01021		441.1	10.959	2.48447
			V_ppm_m51_Int2SE	33	24	22	16	21	25	24	18	25	17
Cr	16.065		Cr_ppm_m53	17.2	16.4	17	18	16.3	16.4	15.9	14.4	14.4	15		Cr_ppm_m53	1.07065	1.02085	1.0582	1.12045	1.01463	1.02085	0.989729	0.896359	0.896359	0.933707	1.00218		16.1	1.19629	7.43038
			Cr_ppm_m53_Int2SE	1.8	1.9	1.9	2	1.6	1.3	1.6	1.5	1.6	1.6
Co	38.11		Co_ppm_m59	39.8	39.3	39.4	39.4	38.7	38.6	35.8	36.9	37.5	37.9		Co_ppm_m59	1.04435	1.03123	1.03385	1.03385	1.01548	1.01286	0.939386	0.96825	0.983994	0.99449	1.00577		38.33	1.28759	3.35922
			Co_ppm_m59_Int2SE	1.8	1.6	2	2	1.6	2.1	1.3	1.5	2.1	1.3
Ni	12.224		Ni_ppm_m60	12.1	12.5	12.3	12.1	12.25	12.1	10.38	12.4	12.2	12.2		Ni_ppm_m60	0.989856	1.02258	1.00622	0.989856	1.00213	0.989856	0.849149	1.0144	0.998037	0.998037	0.986011		12.053	0.602662	5.0001
			Ni_ppm_m60_Int2SE	1.2	1.2	1.3	1.4	0.8	1.3	0.98	1.4	1.1	1
Cu	18.358		Cu_ppm_m65	18	16.2	18.4	15.9	17.5	16.5	16.2	15.5	17.6	17.7		Cu_ppm_m65	0.980499	0.882449	1.00229	0.866107	0.953263	0.898791	0.882449	0.844319	0.95871	0.964157	0.923303		16.95	1.00139	5.90789
			Cu_ppm_m65_Int2SE	1.5	1.3	1.6	1.5	1.4	1.2	1.5	1.5	1.5	1.4
Zn	154.298		Zn_ppm_m66	152.9	139.9	167.9	162.2	155.8	152	141.1	139.8	117.1	130.3		Zn_ppm_m66	0.99094	0.906687	1.08815	1.05121	1.00973	0.985107	0.914464	0.906039	0.758921	0.84447	0.945573		145.9	15.286	10.477
			Zn_ppm_m66_Int2SE	8.8	8.7	9.7	8.3	8.1	9.7	4.7	6.1	6.7	5.2
Ga	21.537		Ga_ppm_m71	21.8	21.59	21.9	21.8	22.1	21.9	21.9	21.1	21.1	21.9		Ga_ppm_m71	1.01221	1.00246	1.01685	1.01221	1.02614	1.01685	1.01685	0.979709	0.979709	1.01685	1.00799		21.709	0.34501	1.58925
			Ga_ppm_m71_Int2SE	1.1	0.93	1.1	1.2	1.1	1.2	1.2	1.3	1.1	1
Ge	1.81		Ge_ppm_m74	1.24	1.71	2.15	1.5	1.58	1.51	2.69	1.83	1.7	1.71		Ge_ppm_m74	0.685083	0.944751	1.18785	0.828729	0.872928	0.834254	1.48619	1.01105	0.939227	0.944751	0.973481		1.762	0.403231	22.8849
			Ge_ppm_m74_Int2SE	0.36	0.47	0.5	0.52	0.54	0.5	0.61	0.49	0.46	0.38
Rb	48.09		Rb_ppm_m85	49.4	48.5	50.1	48.4	47.1	47.4	46.6	47.1	47.3	48		Rb_ppm_m85	1.02724	1.00853	1.0418	1.00645	0.979414	0.985652	0.969016	0.979414	0.983572	0.998129	0.997921		47.99	1.11599	2.32547
			Rb_ppm_m85_Int2SE	2.2	2.2	2	1.9	2.2	2.6	2.2	1.9	2.4	2.2
Sr	340.328		Sr_ppm_m88	354	343	347	339	336	342	332	327	328	352		Sr_ppm_m88	1.04017	1.00785	1.0196	0.996098	0.987283	1.00491	0.975529	0.960838	0.963776	1.0343	0.999036		340	9.40449	2.76603
			Sr_ppm_m88_Int2SE	17	16	13	14	11	14	15	15	19	16
Y	32.605		Y_ppm_m89	35.7	34.9	34.1	33.9	34.1	35.5	31.6	33.3	31.9	33.4		Y_ppm_m89	1.09492	1.07039	1.04585	1.03972	1.04585	1.08879	0.969177	1.02132	0.978378	1.02438	1.03788		33.84	1.36398	4.03068
			Y_ppm_m89_Int2SE	2	1.6	1.2	1.3	1.3	2.2	1.3	1.4	1.8	1.4
Zr	175.087		Zr_ppm_m90	191	187.4	186	183	184.6	183	173.9	178.4	173.8	181.1		Zr_ppm_m90	1.09089	1.07033	1.06233	1.04519	1.05433	1.04519	0.993221	1.01892	0.992649	1.03434	1.04074		182.22	5.58824	3.06676
			Zr_ppm_m90_Int2SE	10	8	6.7	6.8	7.6	10	8.2	8.1	8.6	7.8
Nb	12.117		Nb_ppm_m93	11.97	11.94	12.53	11.86	12.26	11.91	11.87	11.66	11.9	12.43		Nb_ppm_m93	0.987868	0.985392	1.03408	0.97879	1.0118	0.982917	0.979615	0.962284	0.982091	1.02583	0.993068		12.033	0.27833	2.31306
			Nb_ppm_m93_Int2SE	0.58	0.71	0.53	0.4	0.52	0.48	0.61	0.55	0.73	0.53
Mo	250.491		Mo_ppm_m95	264	259.2	276	260	260.9	261.6	257	256	266	267.3		Mo_ppm_m95	1.05393	1.03477	1.10184	1.03796	1.04155	1.04435	1.02598	1.02199	1.06191	1.0671	1.04914		262.8	5.8869	2.24007
			Mo_ppm_m95_Int2SE	10	9	11	10	8.3	9.7	13	10	15	9.8
Cd	0.203432		Cd_ppm_m111	0.12	Below LOD	0.14	0.24	0.051	0.098	Below LOD	0.12	0.15	0.082		Cd_ppm_m111	0.589879	#VALUE!	0.688192	1.17976	0.250698	0.481734	#VALUE!	0.589879	0.737348	0.403084	0.615071		0.125125	0.0562886	44.9859		Cd concentrations in BCR-2G close or at DL with 50µm spot size
			Cd_ppm_m111_Int2SE	0.1	Below LOD	0.1	0.13	0.058	0.086	Below LOD	0.11	0.086	0.062
In	0.0980432		In_ppm_m115_corrected	0.075384	0.08537	0.103908	0.08486	0.086962	0.144942	0.070322	0.100826	0.08786	0.081996		In_ppm_m115	0.768886	0.870739	1.05982	0.865537	0.886977	1.47835	0.717255	1.02838	0.896136	0.836325	0.940841		0.092243	0.0210964	22.8705		In can be be inhomogenouse in BCR-2G (see Jenner & O'Neill, 2012)
			In_ppm_m115_Int2SE	0.027	0.034	0.027	0.022	0.027	0.034	0.03	0.025	0.025	0.027
Sn	2.074		Sn_ppm_m118	2.24	1.95	2.38	2.1	2.07	2.37	1.67	2.11	2.1	2.06		Sn_ppm_m118	1.08004	0.940212	1.14754	1.01254	0.998071	1.14272	0.805207	1.01736	1.01254	0.99325	1.01495		2.105	0.205656	9.76989
			Sn_ppm_m118_Int2SE	0.21	0.24	0.29	0.21	0.25	0.23	0.18	0.18	0.25	0.24
Sb	0.321		Sb_ppm_m121	0.308	0.294	0.349	0.333	0.299	0.254	0.257	0.272	0.246	0.278		Sb_ppm_m121	0.959502	0.915888	1.08723	1.03738	0.931464	0.791277	0.800623	0.847352	0.766355	0.866044	0.900312		0.289	0.0342053	11.8357
			Sb_ppm_m121_Int2SE	0.053	0.048	0.062	0.053	0.057	0.042	0.043	0.046	0.061	0.047
Cs	1.179		Cs_ppm_m133	1.158	1.207	1.242	1.223	1.184	1.262	1.176	1.145	1.18	1.209		Cs_ppm_m133	0.982188	1.02375	1.05344	1.03732	1.00424	1.0704	0.997455	0.971162	1.00085	1.02545	1.01662		1.1986	0.0369209	3.08034
			Cs_ppm_m133_Int2SE	0.087	0.076	0.073	0.068	0.081	0.094	0.076	0.075	0.083	0.05
Ba	670		Ba_ppm_m137	601	577	736	754	659	614	667	678	644	684		Ba_ppm_m137	0.897015	0.861194	1.09851	1.12537	0.983582	0.916418	0.995522	1.01194	0.961194	1.0209	0.987164		661.4	56.0599	8.47594
			Ba_ppm_m137_Int2SE	22	25	30	35	25	31	29	24	35	26
La	24.42		La_ppm_m139	25.17	25.22	25.56	25.2	25.22	24.79	23.84	24.44	24	25.13		La_ppm_m139	1.03071	1.03276	1.04668	1.03194	1.03276	1.01515	0.976249	1.00082	0.982801	1.02907	1.0179		24.857	0.57687	2.32075
			La_ppm_m139_Int2SE	0.9	0.95	0.95	1	0.93	0.95	0.84	0.65	1.1	0.74
Ce	50.974		Ce_ppm_m140	53.1	52.9	53.9	52	52.5	51.6	49	50.1	49.1	50.5		Ce_ppm_m140	1.04171	1.03778	1.0574	1.02013	1.02994	1.01228	0.961274	0.982854	0.963236	0.990701	1.00973		51.47	1.71597	3.33392
			Ce_ppm_m140_Int2SE	1.7	1.8	2	2	2.1	1.5	1.5	1.6	2	1.3
Pr	6.463		Pr_ppm_m141	6.67	6.54	6.7	6.53	6.68	6.57	6.09	6.38	6.23	6.35		Pr_ppm_m141	1.03203	1.01191	1.03667	1.01037	1.03358	1.01656	0.942287	0.987158	0.963949	0.982516	1.0017		6.474	0.205437	3.17327
			Pr_ppm_m141_Int2SE	0.28	0.28	0.3	0.22	0.31	0.26	0.18	0.27	0.34	0.21
Nd	27.725		Nd_ppm_m146	28.9	28.4	29.4	27.9	27.5	26.5	26.8	27.6	28.5	27.7		Nd_ppm_m146	1.04238	1.02435	1.06041	1.00631	0.991885	0.955816	0.966637	0.995491	1.02795	0.999098	1.00703		27.92	0.901604	3.22924
			Nd_ppm_m146_Int2SE	1.5	1.3	1.2	1.3	1.3	1.4	1.4	1.4	1.6	1.1
Sm	6.438		Sm_ppm_m147	6.86	6.71	6.43	6.17	6.76	6.43	6.35	6.3	6.01	6.4		Sm_ppm_m147	1.06555	1.04225	0.998757	0.958372	1.05002	0.998757	0.986331	0.978565	0.93352	0.994098	1.00062		6.442	0.26645	4.13614
			Sm_ppm_m147_Int2SE	0.5	0.53	0.49	0.49	0.55	0.5	0.4	0.5	0.46	0.47
Eu	1.919		Eu_ppm_m153	2.08	2.03	2.02	1.85	1.83	2.08	1.84	1.92	1.87	1.78		Eu_ppm_m153	1.0839	1.05784	1.05263	0.964044	0.953622	1.0839	0.958833	1.00052	0.974466	0.927566	1.00573		1.93	0.112448	5.8263
			Eu_ppm_m153_Int2SE	0.17	0.12	0.14	0.11	0.11	0.2	0.12	0.13	0.16	0.11
Gd	6.36		Gd_ppm_m157	6.68	6.94	6.24	6.62	6.36	6.37	6.3	6.3	6.83	6.88		Gd_ppm_m157	1.05031	1.09119	0.981132	1.04088	1	1.00157	0.990566	0.990566	1.0739	1.08176	1.03019		6.552	0.268899	4.10407
			Gd_ppm_m157_Int2SE	0.54	0.49	0.51	0.59	0.52	0.56	0.44	0.5	0.58	0.48
Tb	0.983		Tb_ppm_m159	0.983	0.996	1.006	1.054	1.069	1.006	0.953	0.992	1.022	0.972		Tb_ppm_m159	1	1.01322	1.0234	1.07223	1.08749	1.0234	0.969481	1.00916	1.03967	0.98881	1.02269		1.0053	0.0354559	3.5269
			Tb_ppm_m159_Int2SE	0.075	0.078	0.077	0.096	0.068	0.073	0.067	0.067	0.089	0.061
Dy	6.087		Dy_ppm_m163	6.62	6.7	6.26	6.74	6.44	6.6	6.28	6.05	5.92	6.19		Dy_ppm_m163	1.08756	1.10071	1.02842	1.10728	1.05799	1.08428	1.03171	0.993921	0.972564	1.01692	1.04814		6.38	0.283353	4.44127
			Dy_ppm_m163_Int2SE	0.47	0.4	0.41	0.41	0.5	0.48	0.34	0.42	0.39	0.39
Ho	1.248		Ho_ppm_m165	1.324	1.4	1.33	1.284	1.346	1.33	1.195	1.222	1.207	1.269		Ho_ppm_m165	1.0609	1.12179	1.06571	1.02885	1.07853	1.06571	0.957532	0.979167	0.967147	1.01683	1.03421		1.2907	0.0671665	5.20388
			Ho_ppm_m165_Int2SE	0.071	0.09	0.11	0.069	0.091	0.1	0.091	0.099	0.082	0.084
Er	3.524		Er_ppm_m166	3.75	3.82	3.62	3.78	3.79	3.6	3.37	3.64	3.33	3.69		Er_ppm_m166	1.06413	1.084	1.02724	1.07264	1.07548	1.02157	0.9563	1.03292	0.944949	1.04711	1.03263		3.639	0.169997	4.67152
			Er_ppm_m166_Int2SE	0.25	0.3	0.22	0.24	0.24	0.29	0.24	0.3	0.26	0.25
Tm	0.488		Tm_ppm_m169	0.505	0.533	0.571	0.533	0.555	0.538	0.513	0.515	0.497	0.473		Tm_ppm_m169	1.03484	1.09221	1.17008	1.09221	1.1373	1.10246	1.05123	1.05533	1.01844	0.969262	1.07234		0.5233	0.0287056	5.48549
			Tm_ppm_m169_Int2SE	0.051	0.052	0.058	0.048	0.063	0.059	0.046	0.05	0.044	0.049
Yb	3.328		Yb_ppm_m172	3.76	3.64	3.42	3.48	3.25	3.87	3.44	3.36	2.96	3.49		Yb_ppm_m172	1.12981	1.09375	1.02764	1.04567	0.976562	1.16286	1.03365	1.00962	0.889423	1.04868	1.04177		3.467	0.257641	7.43124
			Yb_ppm_m172_Int2SE	0.32	0.3	0.34	0.32	0.3	0.31	0.32	0.37	0.24	0.32
Lu	0.485		Lu_ppm_m175	0.496	0.506	0.488	0.532	0.506	0.595	0.479	0.489	0.487	0.49		Lu_ppm_m175	1.02268	1.0433	1.00619	1.09691	1.0433	1.2268	0.987629	1.00825	1.00412	1.01031	1.04495		0.5068	0.034399	6.78748
			Lu_ppm_m175_Int2SE	0.062	0.051	0.052	0.054	0.062	0.057	0.063	0.068	0.052	0.046
Hf	4.721		Hf_ppm_m177	4.78	5.15	4.91	5.05	5.05	4.67	4.71	4.86	4.7	4.73		Hf_ppm_m177	1.0125	1.09087	1.04003	1.06969	1.06969	0.989197	0.99767	1.02944	0.995552	1.00191	1.02965		4.861	0.172011	3.53859
			Hf_ppm_m177_Int2SE	0.31	0.35	0.4	0.3	0.43	0.34	0.31	0.33	0.42	0.29
Ta	0.72		Ta_ppm_m181	0.76	0.736	0.747	0.715	0.807	0.739	0.671	0.726	0.766	0.744		Ta_ppm_m181	1.05556	1.02222	1.0375	0.993056	1.12083	1.02639	0.931944	1.00833	1.06389	1.03333	1.02931		0.7411	0.0353033	4.76363
			Ta_ppm_m181_Int2SE	0.074	0.069	0.077	0.063	0.064	0.056	0.068	0.068	0.076	0.068
W	0.521		W_ppm_m182	0.531	0.562	0.504	0.559	0.547	0.542	0.528	0.537	0.432	0.511		W_ppm_m182	1.01919	1.07869	0.96737	1.07294	1.0499	1.04031	1.01344	1.03071	0.829175	0.980806	1.00825		0.5253	0.0376712	7.17138
			W_ppm_m182_Int2SE	0.081	0.076	0.082	0.081	0.082	0.07	0.084	0.086	0.069	0.059
Tl	0.201		Tl_ppm_m205	0.205	0.236	0.238	0.254	0.261	0.219	0.202	0.222	0.259	0.26		Tl_ppm_m205	1.0199	1.17413	1.18408	1.26368	1.29851	1.08955	1.00498	1.10448	1.28856	1.29353	1.17214		0.2356	0.0227508	9.65655		Tl can be be inhomogenouse in BCR-2G (see Jenner & O'Neill, 2012)
			Tl_ppm_m205_Int2SE	0.032	0.025	0.027	0.043	0.037	0.03	0.024	0.034	0.03	0.029
Pb	9.959		Pb_ppm_m208	10.56	10.53	10.71	10.08	10.57	10.85	10.84	10.46	10.28	10.41		Pb_ppm_m208	1.06035	1.05734	1.07541	1.01215	1.06135	1.08947	1.08846	1.05031	1.03223	1.04529	1.05723		10.529	0.239836	2.27786
			Pb_ppm_m208_Int2SE	0.54	0.56	0.53	0.42	0.46	0.55	0.5	0.48	0.78	0.55
Bi	0.0495337		Bi_ppm_m209	0.033	0.0312	0.052	0.032	0.0401	0.0388	0.031	0.0307	0.0298	0.031		Bi_ppm_m209	0.666213	0.629874	1.04979	0.646025	0.80955	0.783305	0.625836	0.61978	0.601611	0.625836	0.705782		0.03496	0.00694745	19.8726		Bi can be be inhomogenouse in BCR-2G (see Jenner & O'Neill, 2012)
			Bi_ppm_m209_Int2SE	0.012	0.0092	0.017	0.01	0.0098	0.0093	0.011	0.0089	0.0099	0.011
Th	5.8		Th_ppm_m232	6.03	6.07	6.19	5.93	5.9	6.11	5.73	5.85	5.66	6		Th_ppm_m232	1.03966	1.04655	1.06724	1.02241	1.01724	1.05345	0.987931	1.00862	0.975862	1.03448	1.02534		5.947	0.167269	2.81266
			Th_ppm_m232_Int2SE	0.28	0.35	0.38	0.31	0.34	0.31	0.3	0.3	0.24	0.25
U	1.72		U_ppm_m238	1.74	1.71	1.84	1.57	1.79	1.74	1.65	1.62	1.67	1.716		U_ppm_m238	1.01163	0.994186	1.06977	0.912791	1.0407	1.01163	0.959302	0.94186	0.97093	0.997674	0.991047		1.7046	0.0801002	4.69906
			U_ppm_m238_Int2SE	0.12	0.11	0.14	0.11	0.11	0.12	0.11	0.1	0.13	0.092
															Th/U	1.02771	1.05267	0.997639	1.1201	0.977461	1.04134	1.02984	1.07088	1.00508	1.03689	1.03461

## Sheet: 14_03_24_Batch2_OU1_40mu 
	29Si Internal Standard		Iolite Input
			Date	2024-03-14	2024-03-14	2024-03-14	2024-03-14
			Duration(s)	23.291	23.413	21.489	23.082
			Comments	BCR-40-1	BCR-40-2	BCR-40-3	BCR-40-4
			IntStd (wt% Oxide)	54.4	54.4	54.4	54.4		Measured/Prefered Values							Average - STDEV - RSD
Pref Values
BCR-2G (ppm)										BCR-40-1	BCR-40-2	BCR-40-3	BCR-40-4	AVERAGE		Average	STDEV	RSD
Li	9.374		Li_ppm_m7	8.16	8.48	8.99	8.98		Li_ppm_m7	0.870493	0.90463	0.959036	0.957969	0.923032		8.6525	0.405576	4.68738
			Li_ppm_m7_Int2SE	0.5	0.55	0.58	0.57
Be	2.097		Be_ppm_m9	1.64	1.67	2.27	1.64		Be_ppm_m9	0.78207	0.796376	1.0825	0.78207	0.860753		1.805	0.310322	17.1924
			Be_ppm_m9_Int2SE	0.56	0.53	0.58	0.5
Sc	34.046		Sc_ppm_m45	31.1	33.5	31.9	32		Sc_ppm_m45	0.91347	0.983963	0.936968	0.939905	0.943576		32.125	1.00125	3.11673
			Sc_ppm_m45_Int2SE	1.4	1.8	2.1	1.6
V	436.642		V_ppm_m51	396	403	385	402		V_ppm_m51	0.906921	0.922953	0.881729	0.920663	0.908067		396.5	8.2664	2.08484
			V_ppm_m51_Int2SE	12	17	20	16
Cr	16.065		Cr_ppm_m53	15.5	16.6	14.5	15.9		Cr_ppm_m53	0.96483	1.0333	0.902583	0.989729	0.972611		15.625	0.877021	5.61294
			Cr_ppm_m53_Int2SE	1.3	2.1	1.8	2.1
Co	38.11		Co_ppm_m59	37.1	37.1	36.5	37.3		Co_ppm_m59	0.973498	0.973498	0.957754	0.978746	0.970874		37	0.34641	0.936244
			Co_ppm_m59_Int2SE	1.3	1.8	1.7	1.8
Ni	12.224		Ni_ppm_m60	12.1	11.97	11.9	12.2		Ni_ppm_m60	0.989856	0.979221	0.973495	0.998037	0.985152		12.0425	0.13376	1.11073
			Ni_ppm_m60_Int2SE	1.1	0.92	1.6	1.3
Cu	18.358		Cu_ppm_m65	19	18.1	19.9	17.6		Cu_ppm_m65	1.03497	0.985946	1.084	0.95871	1.01591		18.65	1.01489	5.44176
			Cu_ppm_m65_Int2SE	1.8	1.4	1.9	1.4
Zn	154.298		Zn_ppm_m66	133.3	140.5	142.9	144.8		Zn_ppm_m66	0.863913	0.910576	0.92613	0.938444	0.909766		140.375	5.03413	3.5862
			Zn_ppm_m66_Int2SE	7.1	7.7	6.5	8.1
Ga	21.537		Ga_ppm_m71	20.9	21	21.4	21.5		Ga_ppm_m71	0.970423	0.975066	0.993639	0.998282	0.984353		21.2	0.294392	1.38864
			Ga_ppm_m71_Int2SE	1.2	1.3	1.8	1.3
Ge	1.81		Ge_ppm_m74	1.52	1.57	1.84	2.24		Ge_ppm_m74	0.839779	0.867403	1.01657	1.23757	0.990331		1.7925	0.329785	18.3981
			Ge_ppm_m74_Int2SE	0.66	0.59	0.58	0.69
Rb	48.09		Rb_ppm_m85	46.2	46.4	45.9	46.3		Rb_ppm_m85	0.960699	0.964858	0.95446	0.962778	0.960699		46.2	0.216025	0.467586
			Rb_ppm_m85_Int2SE	2	1.6	2.1	2
Sr	340.328		Sr_ppm_m88	316	322.9	313	321		Sr_ppm_m88	0.928516	0.948791	0.919701	0.943208	0.935054		318.225	4.539	1.42635
			Sr_ppm_m88_Int2SE	11	9.5	12	17
Y	32.605		Y_ppm_m89	31.4	31.7	30.3	31.8		Y_ppm_m89	0.963042	0.972244	0.929305	0.975311	0.959975		31.3	0.687992	2.19806
			Y_ppm_m89_Int2SE	1.2	1.2	1.5	1.6
Zr	175.087		Zr_ppm_m90	165.1	165.6	164	169.9		Zr_ppm_m90	0.94296	0.945816	0.936677	0.970375	0.948957		166.15	2.58779	1.5575
			Zr_ppm_m90_Int2SE	6.7	7.1	11	8.1
Nb	12.117		Nb_ppm_m93	11.03	11.28	11.42	11.65		Nb_ppm_m93	0.910291	0.930923	0.942478	0.961459	0.936288		11.345	0.259551	2.2878
			Nb_ppm_m93_Int2SE	0.37	0.48	0.69	0.51
Mo	250.491		Mo_ppm_m95	247.6	257.4	257	259		Mo_ppm_m95	0.988459	1.02758	1.02598	1.03397	1.019		255.25	5.17268	2.02652
			Mo_ppm_m95_Int2SE	6.2	8.3	13	11
Cd	0.203432		Cd_ppm_m111	0.33	Below LOD	0.09	Below LOD		Cd_ppm_m111	1.62217	#VALUE!	0.442409	#VALUE!	1.03229		0.21	0.169706	80.8122		Cd concentrations in BCR-2G close or at DL with 50µm spot size
			Cd_ppm_m111_Int2SE	0.2	Below LOD	0.13	Below LOD
In	0.0980432		In_ppm_m115_corrected	0.120404	0.10635	0.06754	0.110234		In_ppm_m115	1.22807	1.08473	0.68888	1.12434	1.0315		0.101132	0.0231654	22.9061		In can be be inhomogenouse in BCR-2G (see Jenner & O'Neill, 2012)
			In_ppm_m115_Int2SE	0.031	0.034	0.028	0.031
Sn	2.074		Sn_ppm_m118	1.94	2.25	1.9	1.99		Sn_ppm_m118	0.935391	1.08486	0.916104	0.959499	0.973963		2.02	0.157692	7.80652
			Sn_ppm_m118_Int2SE	0.17	0.31	0.23	0.22
Sb	0.321		Sb_ppm_m121	0.276	0.269	0.34	0.374		Sb_ppm_m121	0.859813	0.838006	1.05919	1.16511	0.98053		0.31475	0.0508027	16.1407
			Sb_ppm_m121_Int2SE	0.081	0.061	0.076	0.071
Cs	1.179		Cs_ppm_m133	1.111	1.148	1.106	1.124		Cs_ppm_m133	0.942324	0.973707	0.938083	0.95335	0.951866		1.12225	0.0187683	1.67238
			Cs_ppm_m133_Int2SE	0.064	0.077	0.089	0.078
Ba	670		Ba_ppm_m137	641	644	633	642		Ba_ppm_m137	0.956716	0.961194	0.944776	0.958209	0.955224		640	4.83046	0.754759
			Ba_ppm_m137_Int2SE	17	18	30	26
La	24.42		La_ppm_m139	23.21	23.79	22.87	22.98		La_ppm_m139	0.95045	0.974201	0.936527	0.941032	0.950553		23.2125	0.410234	1.7673
			La_ppm_m139_Int2SE	0.75	0.72	0.95	0.89
Ce	50.974		Ce_ppm_m140	48.2	48.2	47.3	48.4		Ce_ppm_m140	0.94558	0.94558	0.927924	0.949504	0.942147		48.025	0.492443	1.02539
			Ce_ppm_m140_Int2SE	1.2	1.3	1.6	1.5
Pr	6.463		Pr_ppm_m141	6.25	6.24	6.11	6.42		Pr_ppm_m141	0.967043	0.965496	0.945381	0.993347	0.967817		6.255	0.127148	2.03275
			Pr_ppm_m141_Int2SE	0.23	0.28	0.33	0.34
Nd	27.725		Nd_ppm_m146	26.4	26.1	26.4	27.4		Nd_ppm_m146	0.952209	0.941389	0.952209	0.988278	0.958521		26.575	0.567891	2.13694
			Nd_ppm_m146_Int2SE	1.3	1.1	1.4	1.5
Sm	6.438		Sm_ppm_m147	6.37	6.12	6.2	5.89		Sm_ppm_m147	0.989438	0.950606	0.963032	0.91488	0.954489		6.145	0.199416	3.24517
			Sm_ppm_m147_Int2SE	0.43	0.51	0.5	0.52
Eu	1.919		Eu_ppm_m153	1.76	1.74	1.77	1.78		Eu_ppm_m153	0.917144	0.906722	0.922355	0.927566	0.918447		1.7625	0.0170783	0.968979
			Eu_ppm_m153_Int2SE	0.12	0.14	0.17	0.16
Gd	6.36		Gd_ppm_m157	5.64	5.98	5.94	6.23		Gd_ppm_m157	0.886792	0.940252	0.933962	0.97956	0.935142		5.9475	0.241851	4.06642
			Gd_ppm_m157_Int2SE	0.47	0.49	0.54	0.73
Tb	0.983		Tb_ppm_m159	0.963	0.932	0.926	0.967		Tb_ppm_m159	0.979654	0.948118	0.942014	0.983723	0.963377		0.947	0.0209921	2.21669
			Tb_ppm_m159_Int2SE	0.093	0.074	0.084	0.091
Dy	6.087		Dy_ppm_m163	6.11	6	5.8	5.88		Dy_ppm_m163	1.00378	0.985707	0.95285	0.965993	0.977082		5.9475	0.135984	2.28641
			Dy_ppm_m163_Int2SE	0.46	0.44	0.46	0.6
Ho	1.248		Ho_ppm_m165	1.16	1.085	1.253	1.172		Ho_ppm_m165	0.929487	0.869391	1.00401	0.939103	0.935497		1.1675	0.0687823	5.89141
			Ho_ppm_m165_Int2SE	0.1	0.076	0.095	0.088
Er	3.524		Er_ppm_m166	3.23	3.48	3.39	3.39		Er_ppm_m166	0.916572	0.987514	0.961975	0.961975	0.957009		3.3725	0.104043	3.08505
			Er_ppm_m166_Int2SE	0.27	0.25	0.33	0.33
Tm	0.488		Tm_ppm_m169	0.464	0.52	0.442	0.449		Tm_ppm_m169	0.95082	1.06557	0.905738	0.920082	0.960553		0.46875	0.0353777	7.54725
			Tm_ppm_m169_Int2SE	0.059	0.069	0.067	0.06
Yb	3.328		Yb_ppm_m172	3.47	3.55	3.33	3.01		Yb_ppm_m172	1.04267	1.06671	1.0006	0.904447	1.00361		3.34	0.238048	7.12717
			Yb_ppm_m172_Int2SE	0.44	0.33	0.34	0.38
Lu	0.485		Lu_ppm_m175	0.434	0.465	0.443	0.463		Lu_ppm_m175	0.894845	0.958763	0.913402	0.954639	0.930412		0.45125	0.0151959	3.36752
			Lu_ppm_m175_Int2SE	0.044	0.057	0.074	0.06
Hf	4.721		Hf_ppm_m177	4.53	4.77	4.86	4.51		Hf_ppm_m177	0.959542	1.01038	1.02944	0.955306	0.988668		4.6675	0.174428	3.73707
			Hf_ppm_m177_Int2SE	0.32	0.45	0.53	0.27
Ta	0.72		Ta_ppm_m181	0.728	0.654	0.69	0.749		Ta_ppm_m181	1.01111	0.908333	0.958333	1.04028	0.979514		0.70525	0.041995	5.95463
			Ta_ppm_m181_Int2SE	0.076	0.07	0.1	0.07
W	0.521		W_ppm_m182	0.535	0.61	0.51	0.497		W_ppm_m182	1.02687	1.17083	0.978887	0.953935	1.03263		0.538	0.0505239	9.39106
			W_ppm_m182_Int2SE	0.091	0.1	0.11	0.082
Tl	0.201		Tl_ppm_m205	0.236	0.195	0.196	0.215		Tl_ppm_m205	1.17413	0.970149	0.975124	1.06965	1.04726		0.2105	0.0193305	9.18312		Tl can be be inhomogenouse in BCR-2G (see Jenner & O'Neill, 2012)
			Tl_ppm_m205_Int2SE	0.034	0.035	0.036	0.036
Pb	9.959		Pb_ppm_m208	9.64	9.85	9.26	9.57		Pb_ppm_m208	0.967969	0.989055	0.929812	0.96094	0.961944		9.58	0.244268	2.54977
			Pb_ppm_m208_Int2SE	0.43	0.45	0.67	0.55
Bi	0.0495337		Bi_ppm_m209	0.04	0.038	0.038	0.046		Bi_ppm_m209	0.807531	0.767154	0.767154	0.928661	0.817625		0.0405	0.00378594	9.348		Bi can be be inhomogenouse in BCR-2G (see Jenner & O'Neill, 2012)
			Bi_ppm_m209_Int2SE	0.013	0.015	0.014	0.017
Th	5.8		Th_ppm_m232	5.51	5.47	5.6	5.76		Th_ppm_m232	0.95	0.943103	0.965517	0.993103	0.962931		5.585	0.128712	2.30459
			Th_ppm_m232_Int2SE	0.3	0.28	0.32	0.32
U	1.72		U_ppm_m238	1.66	1.69	1.45	1.68		U_ppm_m238	0.965116	0.982558	0.843023	0.976744	0.94186		1.62	0.114018	7.03812
			U_ppm_m238_Int2SE	0.12	0.12	0.11	0.13
									Th/U	0.984337	0.959845	1.1453	1.01675	1.02237

## Sheet: 14_03_24_Batch2_OU1_50mu 
	29Si Internal Standard		Iolite Input
			Date	14/03/2024 (5)	14/03/2024 (5)	14/03/2024 (5)	14/03/2024 (5)	14/03/2024 (5)	14/03/2024 (5)	14/03/2024 (5)	14/03/2024 (5)	14/03/2024 (5)	14/03/2024 (5)	14/03/2024 (5)	14/03/2024 (5)
			Duration(s)	20.505	22.553	22.204	21.314	21.551	21.358	21.585	21.202	22.158	23.316	22.158	23.233
			Comments	BCR-1	BCR-2	BCR-3	BCR-4	BCR-5	BCR-6	BCR-7	BCR-8	BCR-9	BCR-10	BCR-11	BCR-12
			IntStd (wt% Oxide)	54.4	54.4	54.4	54.4	54.4	54.4	54.4	54.4	54.4	54.4	54.4	54.4		Measured/Prefered Values															Average - STDEV - RSD
Pref Values
BCR-2G (ppm)																		BCR-1	BCR-2	BCR-3	BCR-4	BCR-5	BCR-6	BCR-7	BCR-8	BCR-9	BCR-10	BCR-11	BCR-12	AVERAGE		Average	STDEV	RSD
Li	9.374		Li_ppm_m7	9.21	9.23	9.45	9.04	8.51	9.36	8.57	9.18	9.27	9.12	9.49	9.24		Li_ppm_m7	0.982505	0.984638	1.00811	0.96437	0.90783	0.998507	0.914231	0.979304	0.988905	0.972904	1.01237	0.985705	0.974948		9.13917	0.307585	3.36557
			Li_ppm_m7_Int2SE	0.56	0.48	0.72	0.7	0.48	0.68	0.47	0.52	0.56	0.39	0.53	0.49
Be	2.097		Be_ppm_m9	1.5	1.53	2.12	1.89	1.57	2.2	1.84	1.99	2.22	1.84	1.77	1.93		Be_ppm_m9	0.715308	0.729614	1.01097	0.901288	0.748689	1.04912	0.877444	0.948975	1.05866	0.877444	0.844063	0.920362	0.890161		1.86667	0.246146	13.1864
			Be_ppm_m9_Int2SE	0.35	0.48	0.52	0.51	0.46	0.65	0.66	0.6	0.61	0.48	0.43	0.44
Sc	34.046		Sc_ppm_m45	33.4	33.6	33.5	32.8	34.6	34.2	33.7	32.9	35.2	34.6	34.6	35.7		Sc_ppm_m45	0.981026	0.9869	0.983963	0.963402	1.01627	1.00452	0.989837	0.96634	1.0339	1.01627	1.01627	1.04858	1.00061		34.0667	0.899832	2.64138
			Sc_ppm_m45_Int2SE	1.9	1.6	2	2.4	2.2	2	1.9	1.7	2	1.2	1.7	1.6
V	436.642		V_ppm_m51	436	453	431	428	437	430	420	426	453	434	449	440		V_ppm_m51	0.99853	1.03746	0.987079	0.980208	1.00082	0.984788	0.961886	0.975628	1.03746	0.993949	1.0283	1.00769	0.999484		436.417	10.6469	2.43961
			V_ppm_m51_Int2SE	21	23	28	27	27	25	23	22	21	12	24	21
Cr	16.065		Cr_ppm_m53	16.1	16	16.6	16.5	15.6	16.5	14.7	14.9	16.4	16.8	16.8	16		Cr_ppm_m53	1.00218	0.995954	1.0333	1.02708	0.971055	1.02708	0.915033	0.927482	1.02085	1.04575	1.04575	0.995954	1.00062		16.075	0.694295	4.3191
			Cr_ppm_m53_Int2SE	2.3	2	1.8	1.6	1.6	1.8	1.5	2	2.1	1.6	2.1	1.8
Co	38.11		Co_ppm_m59	36.8	37.8	37.3	36.1	38.1	38.2	36.8	38.3	39.2	38.7	36.8	36.9		Co_ppm_m59	0.965626	0.991866	0.978746	0.947258	0.999738	1.00236	0.965626	1.00499	1.0286	1.01548	0.965626	0.96825	0.98618		37.5833	0.936952	2.493
			Co_ppm_m59_Int2SE	1.5	1.3	2.1	1.9	1.8	1.6	1.4	2	1.9	1.7	2.2	1.9
Ni	12.224		Ni_ppm_m60	11	10.6	11.7	10.3	10.3	12.2	12.2	13.3	11.5	12.9	12	11.1		Ni_ppm_m60	0.899869	0.867147	0.957134	0.842605	0.842605	0.998037	0.998037	1.08802	0.940772	1.0553	0.981675	0.90805	0.948271		11.5917	0.975573	8.41616
			Ni_ppm_m60_Int2SE	1.4	1.1	1.1	1.2	1.2	1.5	1.1	1.2	1.1	1.3	1.3	1.1
Cu	18.358		Cu_ppm_m65	17.2	17.1	18.8	17.2	16.8	17.5	16.9	16.5	16.5	17	15.9	16		Cu_ppm_m65	0.936921	0.931474	1.02408	0.936921	0.915132	0.953263	0.92058	0.898791	0.898791	0.926027	0.866107	0.871555	0.923303		16.95	0.757388	4.46836
			Cu_ppm_m65_Int2SE	1.6	1.2	1.8	1.4	1.2	1.4	1.6	1.5	1.8	1.3	1.3	1.1
Zn	154.298		Zn_ppm_m66	153.2	150.3	148.5	156.5	142.7	149	148.7	148.6	153.9	146.6	153.7	145.7		Zn_ppm_m66	0.992884	0.974089	0.962423	1.01427	0.924834	0.965664	0.96372	0.963071	0.997421	0.95011	0.996124	0.944277	0.970741		149.783	3.94458	2.63352
			Zn_ppm_m66_Int2SE	9.5	6.5	7.6	9.6	7.5	9.6	6.6	8.4	8.9	6.9	9.2	6.9
Ga	21.537		Ga_ppm_m71	21.2	20.9	21.4	21.8	21.5	21.1	20.7	20.8	22.6	21.2	22.2	21.2		Ga_ppm_m71	0.984353	0.970423	0.993639	1.01221	0.998282	0.979709	0.961137	0.96578	1.04936	0.984353	1.03078	0.984353	0.992865		21.3833	0.568624	2.65919
			Ga_ppm_m71_Int2SE	1.3	1.1	1.4	1.4	1.1	1.4	1.2	1.2	1.6	1.3	1.5	1.1
Ge	1.81		Ge_ppm_m74	1.87	1.8	2.36	1.56	2.22	1.95	1.68	2.07	1.86	1.74	1.83	1.62		Ge_ppm_m74	1.03315	0.994475	1.30387	0.861878	1.22652	1.07735	0.928177	1.14365	1.02762	0.961326	1.01105	0.895028	1.03867		1.88	0.238556	12.6892
			Ge_ppm_m74_Int2SE	0.49	0.45	0.54	0.54	0.51	0.62	0.46	0.53	0.44	0.34	0.53	0.44
Rb	48.09		Rb_ppm_m85	48.6	47.1	48	49.4	45.9	47.8	46.6	47.1	48.5	48.4	47.6	47.5		Rb_ppm_m85	1.01061	0.979414	0.998129	1.02724	0.95446	0.99397	0.969016	0.979414	1.00853	1.00645	0.989811	0.987731	0.992063		47.7083	0.960548	2.01337
			Rb_ppm_m85_Int2SE	2.3	2.1	2.8	3.6	2.2	2.6	2	2.7	2	1.9	2.5	2.5
Sr	340.328		Sr_ppm_m88	332	334	328	326	333	349	320	335	343	335	342	343		Sr_ppm_m88	0.975529	0.981406	0.963776	0.957899	0.978468	1.02548	0.940269	0.984345	1.00785	0.984345	1.00491	1.00785	0.984345		335	8.21307	2.45166
			Sr_ppm_m88_Int2SE	13	16	20	18	17	19	13	17	15	11	18	14
Y	32.605		Y_ppm_m89	32.6	33.3	31.7	31.8	32.5	33.2	31.8	33.5	34.6	33.7	33.8	34.4		Y_ppm_m89	0.999847	1.02132	0.972244	0.975311	0.99678	1.01825	0.975311	1.02745	1.06119	1.03358	1.03665	1.05505	1.01441		33.075	0.997383	3.01552
			Y_ppm_m89_Int2SE	1.6	1.9	2	1.9	1.9	1.8	1.3	1.8	1.5	1.5	2	1.5
Zr	175.087		Zr_ppm_m90	175	177.4	166	166.6	175	178.2	168.3	173.9	180.2	178.2	178	179.6		Zr_ppm_m90	0.999503	1.01321	0.9481	0.951527	0.999503	1.01778	0.961236	0.993221	1.0292	1.01778	1.01664	1.02578	0.99779		174.7	5.04543	2.88805
			Zr_ppm_m90_Int2SE	8.6	9.2	10	9.5	10	9.8	8	7.6	7.6	6.9	11	6.7
Nb	12.117		Nb_ppm_m93	12.43	12.02	11.67	12.2	11.94	12.22	11.64	11.89	12.16	11.89	12.19	11.88		Nb_ppm_m93	1.02583	0.991995	0.96311	1.00685	0.985392	1.0085	0.960634	0.981266	1.00355	0.981266	1.00602	0.980441	0.991238		12.0108	0.236392	1.96815
			Nb_ppm_m93_Int2SE	0.65	0.65	0.62	0.98	0.77	0.59	0.56	0.7	0.55	0.36	0.79	0.49
Mo	250.491		Mo_ppm_m95	261	270	257	260	258	269	253	259	265	257.1	263	259		Mo_ppm_m95	1.04195	1.07788	1.02598	1.03796	1.02998	1.07389	1.01002	1.03397	1.05792	1.02638	1.04994	1.03397	1.04165		260.925	5.02849	1.92718
			Mo_ppm_m95_Int2SE	10	13	13	16	13	14	11	13	12	8.6	15	11
Cd	0.203432		Cd_ppm_m111	0.095	Below LOD	0.18	0.19	0.18	0.28	0.23	0.36	0.13	0.26	Below LOD	0.04		Cd_ppm_m111	0.466987	#VALUE!	0.884818	0.933975	0.884818	1.37638	1.1306	1.76964	0.639035	1.27807	#VALUE!	0.196626	0.956095		0.1945	0.0934657	48.0543		Cd concentrations in BCR-2G close or at DL with 50µm spot size
			Cd_ppm_m111_Int2SE	0.084	Below LOD	0.13	0.13	0.15	0.16	0.12	0.16	0.1	0.14	Below LOD	0.046
In	0.0980432		In_ppm_m115_corrected	0.0802	0.082554	0.083234	0.092982	0.11886	0.057608	0.0752	0.086132	0.093336	0.084778	0.082268	0.104064		In_ppm_m115	0.818007	0.842017	0.848953	0.948378	1.21232	0.587578	0.767009	0.878511	0.951989	0.864701	0.8391	1.06141	0.884998		0.086768	0.0150542	17.35		In can be be inhomogenouse in BCR-2G (see Jenner & O'Neill, 2012)
			In_ppm_m115_Int2SE	0.025	0.021	0.031	0.026	0.034	0.018	0.025	0.029	0.026	0.026	0.027	0.024
Sn	2.074		Sn_ppm_m118	2	2.19	1.99	1.77	2.1	1.88	2	2.02	1.96	1.83	1.98	2.04		Sn_ppm_m118	0.96432	1.05593	0.959499	0.853423	1.01254	0.906461	0.96432	0.973963	0.945034	0.882353	0.954677	0.983607	0.954677		1.98	0.113458	5.7302
			Sn_ppm_m118_Int2SE	0.2	0.24	0.28	0.27	0.21	0.2	0.2	0.25	0.17	0.24	0.24	0.25
Sb	0.321		Sb_ppm_m121	0.242	0.34	0.301	0.287	0.306	0.258	0.321	0.273	0.324	0.332	0.305	0.317		Sb_ppm_m121	0.753894	1.05919	0.937695	0.894081	0.953271	0.803738	1	0.850467	1.00935	1.03427	0.950156	0.987539	0.936137		0.3005	0.0301737	10.0412
			Sb_ppm_m121_Int2SE	0.051	0.084	0.068	0.054	0.062	0.059	0.062	0.066	0.05	0.054	0.063	0.059
Cs	1.179		Cs_ppm_m133	1.17	1.124	1.154	1.12	1.148	1.195	1.172	1.113	1.173	1.192	1.1	1.149		Cs_ppm_m133	0.992366	0.95335	0.978796	0.949958	0.973707	1.01357	0.994063	0.94402	0.994911	1.01103	0.932994	0.974555	0.97611		1.15083	0.0311297	2.70497
			Cs_ppm_m133_Int2SE	0.086	0.082	0.087	0.077	0.082	0.081	0.069	0.087	0.065	0.063	0.075	0.067
Ba	670		Ba_ppm_m137	644	651	647	646	655	658	627	660	678	666	654	685		Ba_ppm_m137	0.961194	0.971642	0.965672	0.964179	0.977612	0.98209	0.935821	0.985075	1.01194	0.99403	0.976119	1.02239	0.97898		655.917	15.4946	2.36229
			Ba_ppm_m137_Int2SE	24	24	27	41	31	30	23	35	29	18	38	33
La	24.42		La_ppm_m139	23.4	23.64	23.8	23.4	24.12	24.1	23.68	24.24	25.3	25.14	24.5	25.8		La_ppm_m139	0.958231	0.968059	0.974611	0.958231	0.987715	0.986896	0.969697	0.992629	1.03604	1.02948	1.00328	1.05651	0.993448		24.26	0.782908	3.22716
			La_ppm_m139_Int2SE	0.87	0.64	1.2	1.1	0.93	1	0.85	0.98	1.1	0.67	1.4	1.2
Ce	50.974		Ce_ppm_m140	50.1	49.3	50.1	50.1	50.1	50.5	48.8	50.6	51.7	51.4	50	50.2		Ce_ppm_m140	0.982854	0.96716	0.982854	0.982854	0.982854	0.990701	0.957351	0.992663	1.01424	1.00836	0.980892	0.984816	0.985633		50.2417	0.784461	1.56138
			Ce_ppm_m140_Int2SE	1.9	1.4	2	2.3	1.9	1.8	1.4	1.9	2	1.3	2.8	1.8
Pr	6.463		Pr_ppm_m141	6.02	6.2	6.27	6.23	6.31	6.34	6.18	6.35	6.66	6.52	6.41	6.5		Pr_ppm_m141	0.931456	0.959307	0.970138	0.963949	0.976327	0.980969	0.956212	0.982516	1.03048	1.00882	0.991799	1.00572	0.979808		6.3325	0.173264	2.73611
			Pr_ppm_m141_Int2SE	0.32	0.22	0.4	0.31	0.24	0.34	0.31	0.29	0.31	0.27	0.39	0.34
Nd	27.725		Nd_ppm_m146	26.8	27.2	26.4	26.5	26.5	26.9	26.3	27.7	29	27.6	28.3	28		Nd_ppm_m146	0.966637	0.981064	0.952209	0.955816	0.955816	0.970243	0.948602	0.999098	1.04599	0.995491	1.02074	1.00992	0.983469		27.2667	0.859528	3.1523
			Nd_ppm_m146_Int2SE	1.6	1.3	1.4	1.5	1.3	1.4	1.3	1.4	1.5	1.3	1.9	1.5
Sm	6.438		Sm_ppm_m147	5.92	6.36	6	5.95	6.24	5.93	6.47	6.56	6.4	6.72	6.53	6.81		Sm_ppm_m147	0.91954	0.987884	0.931966	0.9242	0.969245	0.921094	1.00497	1.01895	0.994098	1.0438	1.01429	1.05778	0.982319		6.32417	0.314771	4.97728
			Sm_ppm_m147_Int2SE	0.5	0.57	0.55	0.47	0.52	0.48	0.5	0.69	0.46	0.48	0.54	0.4
Eu	1.919		Eu_ppm_m153	1.9	1.91	1.82	1.9	1.772	1.96	1.81	2.03	1.95	2.01	2.06	2.01		Eu_ppm_m153	0.990099	0.99531	0.948411	0.990099	0.923398	1.02137	0.9432	1.05784	1.01615	1.04742	1.07348	1.04742	1.00452		1.92767	0.0927355	4.81077
			Eu_ppm_m153_Int2SE	0.19	0.15	0.16	0.15	0.099	0.18	0.15	0.17	0.17	0.12	0.18	0.18
Gd	6.36		Gd_ppm_m157	6.19	6.32	6.14	5.84	6.54	6.59	6.47	6.25	6.2	6.35	6.29	6.63		Gd_ppm_m157	0.97327	0.993711	0.965409	0.918239	1.0283	1.03616	1.0173	0.982704	0.974843	0.998428	0.988994	1.04245	0.993318		6.3175	0.221693	3.50919
			Gd_ppm_m157_Int2SE	0.45	0.43	0.62	0.55	0.54	0.52	0.52	0.55	0.32	0.48	0.45	0.45
Tb	0.983		Tb_ppm_m159	0.941	0.914	0.937	0.923	0.996	0.959	0.96	0.917	1.083	1.051	1.005	1.033		Tb_ppm_m159	0.957274	0.929807	0.953204	0.938962	1.01322	0.975585	0.976602	0.932859	1.10173	1.06918	1.02238	1.05086	0.993472		0.976583	0.0563955	5.77477
			Tb_ppm_m159_Int2SE	0.074	0.07	0.071	0.082	0.073	0.078	0.064	0.07	0.092	0.078	0.068	0.081
Dy	6.087		Dy_ppm_m163	5.61	5.94	5.76	5.83	5.84	6.05	6.24	6.15	6.19	6.41	6.68	6.3		Dy_ppm_m163	0.921636	0.97585	0.946279	0.957779	0.959422	0.993921	1.02514	1.01035	1.01692	1.05306	1.09742	1.03499	0.999398		6.08333	0.305058	5.01466
			Dy_ppm_m163_Int2SE	0.39	0.3	0.43	0.41	0.3	0.46	0.36	0.36	0.4	0.37	0.56	0.46
Ho	1.248		Ho_ppm_m165	1.256	1.268	1.255	1.194	1.283	1.247	1.186	1.23	1.26	1.361	1.245	1.299		Ho_ppm_m165	1.00641	1.01603	1.00561	0.956731	1.02804	0.999199	0.950321	0.985577	1.00962	1.09054	0.997596	1.04087	1.00721		1.257	0.0460967	3.6672
			Ho_ppm_m165_Int2SE	0.097	0.084	0.092	0.086	0.098	0.096	0.092	0.1	0.11	0.089	0.098	0.095
Er	3.524		Er_ppm_m166	3.6	3.64	3.35	3.23	3.5	3.6	3.31	3.71	3.63	3.65	3.53	3.62		Er_ppm_m166	1.02157	1.03292	0.950624	0.916572	0.99319	1.02157	0.939274	1.05278	1.03008	1.03575	1.0017	1.02724	1.00194		3.53083	0.153295	4.3416
			Er_ppm_m166_Int2SE	0.24	0.28	0.32	0.27	0.22	0.27	0.28	0.24	0.32	0.26	0.27	0.31
Tm	0.488		Tm_ppm_m169	0.407	0.496	0.492	0.478	0.487	0.501	0.463	0.52	0.532	0.518	0.489	0.532		Tm_ppm_m169	0.834016	1.01639	1.0082	0.979508	0.997951	1.02664	0.94877	1.06557	1.09016	1.06148	1.00205	1.09016	1.01008		0.492917	0.0344343	6.98582
			Tm_ppm_m169_Int2SE	0.049	0.059	0.059	0.051	0.062	0.045	0.054	0.063	0.048	0.057	0.06	0.056
Yb	3.328		Yb_ppm_m172	3.2	3.16	3.25	3.35	3.16	3.26	3.31	3.4	3.52	3.3	3.41	3.26		Yb_ppm_m172	0.961538	0.949519	0.976562	1.00661	0.949519	0.979567	0.994591	1.02163	1.05769	0.991587	1.02464	0.979567	0.991086		3.29833	0.107858	3.27007
			Yb_ppm_m172_Int2SE	0.33	0.2	0.33	0.3	0.32	0.31	0.27	0.38	0.36	0.31	0.32	0.21
Lu	0.485		Lu_ppm_m175	0.461	0.483	0.481	0.418	0.501	0.493	0.488	0.479	0.51	0.459	0.456	0.556		Lu_ppm_m175	0.950515	0.995876	0.991753	0.861856	1.03299	1.01649	1.00619	0.987629	1.05155	0.946392	0.940206	1.14639	0.993986		0.482083	0.0337517	7.00121
			Lu_ppm_m175_Int2SE	0.049	0.049	0.044	0.057	0.056	0.06	0.07	0.065	0.062	0.058	0.049	0.057
Hf	4.721		Hf_ppm_m177	4.79	4.81	4.55	4.79	5.08	4.9	4.6	4.99	4.88	4.87	4.95	5.15		Hf_ppm_m177	1.01462	1.01885	0.963779	1.01462	1.07604	1.03792	0.97437	1.05698	1.03368	1.03156	1.04851	1.09087	1.03015		4.86333	0.174634	3.59083
			Hf_ppm_m177_Int2SE	0.29	0.38	0.32	0.44	0.38	0.4	0.4	0.41	0.33	0.28	0.37	0.32
Ta	0.72		Ta_ppm_m181	0.729	0.708	0.695	0.7	0.745	0.646	0.7	0.687	0.746	0.705	0.656	0.752		Ta_ppm_m181	1.0125	0.983333	0.965278	0.972222	1.03472	0.897222	0.972222	0.954167	1.03611	0.979167	0.911111	1.04444	0.980208		0.70575	0.0336077	4.76198
			Ta_ppm_m181_Int2SE	0.054	0.073	0.071	0.068	0.077	0.065	0.049	0.061	0.09	0.064	0.063	0.07
W	0.521		W_ppm_m182	0.558	0.511	0.536	0.47	0.464	0.491	0.501	0.497	0.554	0.559	0.501	0.501		W_ppm_m182	1.07102	0.980806	1.02879	0.902111	0.890595	0.942418	0.961612	0.953935	1.06334	1.07294	0.961612	0.961612	0.982566		0.511917	0.032701	6.38796
			W_ppm_m182_Int2SE	0.077	0.081	0.077	0.067	0.083	0.06	0.086	0.087	0.092	0.082	0.09	0.076
Tl	0.201		Tl_ppm_m205	0.253	0.225	0.225	0.257	0.223	0.242	0.202	0.231	0.263	0.234	0.252	0.242		Tl_ppm_m205	1.25871	1.1194	1.1194	1.27861	1.10945	1.20398	1.00498	1.14925	1.30846	1.16418	1.25373	1.20398	1.18118		0.237417	0.0174744	7.36024		Tl can be be inhomogenouse in BCR-2G (see Jenner & O'Neill, 2012)
			Tl_ppm_m205_Int2SE	0.03	0.033	0.039	0.039	0.031	0.035	0.025	0.027	0.03	0.031	0.031	0.026
Pb	9.959		Pb_ppm_m208	10.23	10.16	10.07	10.78	9.86	10.52	10.2	10.33	10.64	10.72	10.78	10.55		Pb_ppm_m208	1.02721	1.02018	1.01115	1.08244	0.990059	1.05633	1.0242	1.03725	1.06838	1.07641	1.08244	1.05934	1.04462		10.4033	0.304133	2.92342
			Pb_ppm_m208_Int2SE	0.51	0.56	0.6	0.75	0.54	0.63	0.45	0.56	0.48	0.39	0.71	0.48
Bi	0.0495337		Bi_ppm_m209	0.031	0.04	0.047	0.044	0.034	0.048	0.033	0.04	0.042	0.042	0.0312	0.044		Bi_ppm_m209	0.625836	0.807531	0.948849	0.888284	0.686401	0.969037	0.666213	0.807531	0.847907	0.847907	0.629874	0.888284	0.801138		0.0396833	0.00599421	15.1051		Bi can be be inhomogenouse in BCR-2G (see Jenner & O'Neill, 2012)
			Bi_ppm_m209_Int2SE	0.01	0.014	0.014	0.012	0.012	0.013	0.01	0.013	0.01	0.012	0.0093	0.011
Th	5.8		Th_ppm_m232	5.42	5.96	5.48	5.62	5.84	5.74	5.69	5.93	6.05	6.1	5.9	6.17		Th_ppm_m232	0.934483	1.02759	0.944828	0.968966	1.0069	0.989655	0.981034	1.02241	1.0431	1.05172	1.01724	1.06379	1.00431		5.825	0.239488	4.11138
			Th_ppm_m232_Int2SE	0.27	0.25	0.29	0.35	0.28	0.26	0.26	0.31	0.36	0.3	0.33	0.3
U	1.72		U_ppm_m238	1.57	1.73	1.56	1.67	1.62	1.656	1.61	1.695	1.61	1.63	1.57	1.751		U_ppm_m238	0.912791	1.00581	0.906977	0.97093	0.94186	0.962791	0.936047	0.985465	0.936047	0.947674	0.912791	1.01802	0.953101		1.63933	0.062593	3.8182
			U_ppm_m238_Int2SE	0.1	0.12	0.11	0.12	0.11	0.098	0.11	0.089	0.11	0.091	0.11	0.089
																	Th/U	1.02376	1.02165	1.04173	0.997976	1.06905	1.0279	1.04806	1.03749	1.11437	1.10979	1.11443	1.04496	1.05373

## Sheet: 15_03_24_Batch2_OU1_50mu
	29Si Internal Standard		Iolite Input
			Date	2024-03-15	2024-03-15	2024-03-15	2024-03-15	2024-03-15	2024-03-15	2024-03-15	2024-03-15	2024-03-15	2024-03-15	2024-03-15	2024-03-15
			Duration(s)	21.42	21.498	21.964	22.398	21.51	21.953	23.059	21.196	20.12	20.596	22.473	23.191
			Comments	BCR-1	BCR-2	BCR-3	BCR-4	BCR-5	BCR-6	BCR-7	BCR-8	BCR-9	BCR-10	BCR-11	BCR-12
			IntStd (wt% Oxide)	54.4	54.4	54.4	54.4	54.4	54.4	54.4	54.4	54.4	54.4	54.4	54.4		Measured/Prefered Values															Average - STDEV - RSD
Pref Values
BCR-2G (ppm)																		BCR-1	BCR-2	BCR-3	BCR-4	BCR-5	BCR-6	BCR-7	BCR-8	BCR-9	BCR-10	BCR-11	BCR-12	AVERAGE		Average	STDEV	RSD
Li	9.374		Li_ppm_m7	8.53	8.62	8.79	8.55	9.08	9.39	9.43	8.97	9.29	9.16	8.73	9.11		Li_ppm_m7	0.909964	0.919565	0.9377	0.912097	0.968637	1.00171	1.00597	0.956902	0.991039	0.977171	0.931299	0.971837	0.956991		8.97083	0.322024	3.58967
			Li_ppm_m7_Int2SE	0.4	0.49	0.57	0.45	0.52	0.66	0.79	0.68	0.6	0.78	0.44	0.57
Be	2.097		Be_ppm_m9	2.34	2.1	2.57	2.2	2.37	2.02	1.76	1.55	2.46	2.37	1.93	2.19		Be_ppm_m9	1.11588	1.00143	1.22556	1.04912	1.13019	0.963281	0.839294	0.739151	1.1731	1.13019	0.920362	1.04435	1.02766		2.155	0.299864	13.9148
			Be_ppm_m9_Int2SE	0.51	0.7	0.59	0.68	0.55	0.52	0.58	0.54	0.64	0.6	0.46	0.58
Sc	34.046		Sc_ppm_m45	35.1	34.7	34.2	32.9	36.4	35	34.5	32.6	34.5	34.3	33.9	34.3		Sc_ppm_m45	1.03096	1.01921	1.00452	0.96634	1.06914	1.02802	1.01333	0.957528	1.01333	1.00746	0.995712	1.00746	1.00942		34.3667	0.988418	2.87609
			Sc_ppm_m45_Int2SE	2.3	2	2	1.6	2.3	1.8	1.9	1.8	2.8	2.1	1.8	1.7
V	436.642		V_ppm_m51	420	429	429	424	436	430	429	420	445	416	426	429		V_ppm_m51	0.961886	0.982498	0.982498	0.971047	0.99853	0.984788	0.982498	0.961886	1.01914	0.952726	0.975628	0.982498	0.979635		427.75	7.70035	1.8002
			V_ppm_m51_Int2SE	19	24	23	22	23	21	28	25	28	29	18	24
Cr	16.065		Cr_ppm_m53	16.6	16.8	16.8	16.2	14.6	16.5	15.5	16.3	15.7	16	16	16		Cr_ppm_m53	1.0333	1.04575	1.04575	1.0084	0.908808	1.02708	0.96483	1.01463	0.97728	0.995954	0.995954	0.995954	1.00114		16.0833	0.620606	3.85869
			Cr_ppm_m53_Int2SE	2.2	1.7	1.9	2.3	1.9	1.4	1.5	2.1	1.6	1.7	1.7	1.5
Co	38.11		Co_ppm_m59	38.2	39.3	38.5	36.9	38.3	38.3	39.7	36.9	37.8	38.4	37.1	36.5		Co_ppm_m59	1.00236	1.03123	1.01023	0.96825	1.00499	1.00499	1.04172	0.96825	0.991866	1.00761	0.973498	0.957754	0.996895		37.9917	0.987613	2.59955
			Co_ppm_m59_Int2SE	1.7	1.6	2.2	1.4	1.8	1.8	2.7	1.7	1.5	2.3	1.8	1.8
Ni	12.224		Ni_ppm_m60	12.1	12.7	11.1	11.4	11	12	13.3	12.7	13	12.6	13	12.8		Ni_ppm_m60	0.989856	1.03894	0.90805	0.932592	0.899869	0.981675	1.08802	1.03894	1.06348	1.03076	1.06348	1.04712	1.0069		12.3083	0.780976	6.3451
			Ni_ppm_m60_Int2SE	1.2	1.1	1.3	1.1	1.1	1.1	1.2	1.2	1.1	1.5	1.2	1.2
Cu	18.358		Cu_ppm_m65	16.2	17.1	19.4	15.2	15.8	16.8	18.1	15	15.7	16.4	18.2	17.3		Cu_ppm_m65	0.882449	0.931474	1.05676	0.827977	0.86066	0.915132	0.985946	0.817082	0.855213	0.893344	0.991393	0.942368	0.913317		16.7667	1.32345	7.89333
			Cu_ppm_m65_Int2SE	1.7	1.6	1.4	1.3	1.2	1.3	1.4	1.4	1.9	1.2	1.3	1.4
Zn	154.298		Zn_ppm_m66	150.5	146.9	154.3	147	142.7	151.7	156.1	144	160	145.1	152.1	153		Zn_ppm_m66	0.975385	0.952054	1.00001	0.952702	0.924834	0.983162	1.01168	0.933259	1.03695	0.940388	0.985755	0.991588	0.973981		150.283	5.25008	3.49345
			Zn_ppm_m66_Int2SE	8.8	8.6	7.1	6.7	5.8	6.8	9.6	6.9	11	8.5	7.4	9
Ga	21.537		Ga_ppm_m71	21.1	20.6	22.6	21	20.6	22.2	21	20.8	22.1	20.4	22.6	23		Ga_ppm_m71	0.979709	0.956493	1.04936	0.975066	0.956493	1.03078	0.975066	0.96578	1.02614	0.947207	1.04936	1.06793	0.998282		21.5	0.92932	4.32242
			Ga_ppm_m71_Int2SE	1.3	1.2	1.5	1.2	1.3	1.1	1.2	1.2	1.7	1.3	1.4	1.6
Ge	1.81		Ge_ppm_m74	1.49	1.69	2.28	1.96	2	1.88	1.54	1.35	1.92	1.34	2.11	1.43		Ge_ppm_m74	0.823204	0.933702	1.25967	1.08287	1.10497	1.03867	0.850829	0.745856	1.06077	0.740331	1.16575	0.790055	0.96639		1.74917	0.317475	18.1501
			Ge_ppm_m74_Int2SE	0.51	0.45	0.58	0.46	0.46	0.53	0.39	0.41	0.55	0.46	0.56	0.42
Rb	48.09		Rb_ppm_m85	47.4	47.6	49	47.1	48.4	49.1	49.9	48.2	47.7	46.7	47.9	49		Rb_ppm_m85	0.985652	0.989811	1.01892	0.979414	1.00645	1.021	1.03764	1.00229	0.99189	0.971096	0.996049	1.01892	1.00159		48.1667	0.944201	1.96028
			Rb_ppm_m85_Int2SE	2.6	1.9	2.9	2.1	3.1	2.8	3	2.8	3.7	3	1.9	2.3
Sr	340.328		Sr_ppm_m88	338	335	339	326	340	335	343	329	340	329	334	345		Sr_ppm_m88	0.99316	0.984345	0.996098	0.957899	0.999036	0.984345	1.00785	0.966714	0.999036	0.966714	0.981406	1.01373	0.987528		336.083	5.86915	1.74634
			Sr_ppm_m88_Int2SE	22	14	22	13	18	18	23	20	24	20	14	16
Y	32.605		Y_ppm_m89	32.9	32.8	32.5	32.3	33.8	33.7	34.3	32.2	33.3	33.8	34.7	33.7		Y_ppm_m89	1.00905	1.00598	0.99678	0.990646	1.03665	1.03358	1.05199	0.987579	1.02132	1.03665	1.06425	1.03358	1.02234		33.3333	0.799242	2.39773
			Y_ppm_m89_Int2SE	1.6	1.4	2.1	1.5	1.8	1.9	2.4	1.7	1.9	2.6	1.3	1.4
Zr	175.087		Zr_ppm_m90	172.2	174.7	174.7	172.1	175.1	180.8	182	175.5	178	184	179	184.5		Zr_ppm_m90	0.983511	0.99779	0.99779	0.98294	1.00007	1.03263	1.03948	1.00236	1.01664	1.05091	1.02235	1.05376	1.01502		177.717	4.33817	2.44106
			Zr_ppm_m90_Int2SE	7.9	6.9	9.9	7.2	8.1	9.7	12	8.8	11	14	6.1	9.3
Nb	12.117		Nb_ppm_m93	11.57	11.82	11.78	11.71	12.03	12.15	12.14	11.33	12.4	12.01	12.42	12.32		Nb_ppm_m93	0.954857	0.975489	0.972188	0.966411	0.99282	1.00272	1.0019	0.93505	1.02336	0.991169	1.02501	1.01675	0.988143		11.9733	0.340062	2.84016
			Nb_ppm_m93_Int2SE	0.56	0.51	0.73	0.66	0.51	0.68	0.85	0.73	0.71	0.84	0.6	0.66
Mo	250.491		Mo_ppm_m95	253	253	249	249	266	264	269	259	262	267	262	265		Mo_ppm_m95	1.01002	1.01002	0.994048	0.994048	1.06191	1.05393	1.07389	1.03397	1.04595	1.06591	1.04595	1.05792	1.0373		259.833	7.1074	2.73537
			Mo_ppm_m95_Int2SE	14	11	12	9.3	16	14	15	14	13	17	13	9.7
Cd	0.203432		Cd_ppm_m111	0.14	0.11	0.17	0.23	Below LOD	0.28	Below LOD	0.2	0.26	0.14	0.046	0.2		Cd_ppm_m111	0.688192	0.540722	0.835661	1.1306	#VALUE!	1.37638	#VALUE!	0.983131	1.27807	0.688192	0.22612	0.983131	0.87302		0.1776	0.0713352	40.1662		Cd concentrations in BCR-2G close or at DL with 50µm spot size
			Cd_ppm_m111_Int2SE	0.12	0.083	0.12	0.13	Below LOD	0.16	Below LOD	0.14	0.17	0.12	0.052	0.13
In	0.0980432		In_ppm_m115_corrected	0.11086	0.113656	0.10669	0.082302	0.07803	0.120724	0.089826	0.066676	0.107792	0.094268	0.122132	0.088894		In_ppm_m115	1.13073	1.15924	1.08819	0.839447	0.795874	1.23134	0.916188	0.680068	1.09943	0.961495	1.2457	0.906682	1.00453		0.0984875	0.0177555	18.0282		In can be be inhomogenouse in BCR-2G (see Jenner & O'Neill, 2012)
			In_ppm_m115_Int2SE	0.024	0.036	0.031	0.023	0.026	0.027	0.033	0.024	0.032	0.031	0.038	0.026
Sn	2.074		Sn_ppm_m118	2.1	2.16	2.15	1.97	2.05	2.14	2.11	1.86	2.12	1.98	2.02	2.09		Sn_ppm_m118	1.01254	1.04147	1.03664	0.949855	0.988428	1.03182	1.01736	0.896818	1.02218	0.954677	0.973963	1.00771	0.994455		2.0625	0.0900631	4.3667
			Sn_ppm_m118_Int2SE	0.3	0.24	0.27	0.25	0.26	0.24	0.28	0.27	0.34	0.27	0.29	0.25
Sb	0.321		Sb_ppm_m121	0.332	0.211	0.288	0.304	0.363	0.304	0.364	0.387	0.345	0.294	0.277	0.285		Sb_ppm_m121	1.03427	0.657321	0.897196	0.94704	1.13084	0.94704	1.13396	1.20561	1.07477	0.915888	0.862928	0.88785	0.974559		0.312833	0.0482358	15.419
			Sb_ppm_m121_Int2SE	0.053	0.047	0.056	0.048	0.057	0.067	0.044	0.065	0.075	0.064	0.056	0.055
Cs	1.179		Cs_ppm_m133	1.146	1.205	1.14	1.109	1.129	1.187	1.189	1.183	1.227	1.187	1.165	1.163		Cs_ppm_m133	0.97201	1.02205	0.966921	0.940628	0.957591	1.00679	1.00848	1.00339	1.04071	1.00679	0.988126	0.986429	0.99166		1.16917	0.0337446	2.88621
			Cs_ppm_m133_Int2SE	0.061	0.069	0.068	0.066	0.062	0.081	0.096	0.08	0.086	0.098	0.079	0.089
Ba	670		Ba_ppm_m137	653	670	662	645	685	672	684	666	686	660	656	656		Ba_ppm_m137	0.974627	1	0.98806	0.962687	1.02239	1.00299	1.0209	0.99403	1.02388	0.985075	0.979104	0.979104	0.994403		666.25	13.4781	2.02298
			Ba_ppm_m137_Int2SE	25	27	31	25	33	32	42	34	32	40	26	26
La	24.42		La_ppm_m139	24.3	24.03	23.6	24.04	24.48	24.24	24.2	23.6	24.9	24.5	24.53	24.75		La_ppm_m139	0.995086	0.984029	0.966421	0.984439	1.00246	0.992629	0.990991	0.966421	1.01966	1.00328	1.0045	1.01351	0.993619		24.2642	0.405249	1.67015
			La_ppm_m139_Int2SE	1	0.72	1	0.79	0.92	0.96	1.1	1.1	1.1	1.1	0.93	0.83
Ce	50.974		Ce_ppm_m140	49.2	50.5	51	49.4	51.4	50.8	49	49.8	51.8	49.6	51.6	49.8		Ce_ppm_m140	0.965198	0.990701	1.00051	0.969122	1.00836	0.996586	0.961274	0.976969	1.0162	0.973045	1.01228	0.976969	0.987268		50.325	0.982691	1.95269
			Ce_ppm_m140_Int2SE	1.6	1.6	2.6	1.2	1.7	1.3	1.8	2.4	2.9	1.9	1.8	1.7
Pr	6.463		Pr_ppm_m141	6.44	6.28	6.23	6.29	6.6	6.31	6.57	6.52	6.57	6.25	6.6	6.57		Pr_ppm_m141	0.996441	0.971685	0.963949	0.973232	1.0212	0.976327	1.01656	1.00882	1.01656	0.967043	1.0212	1.01656	0.995797		6.43583	0.151745	2.35781
			Pr_ppm_m141_Int2SE	0.34	0.27	0.33	0.22	0.27	0.29	0.31	0.36	0.43	0.28	0.33	0.36
Nd	27.725		Nd_ppm_m146	27.8	26.6	27	27.4	27.2	27.3	28.5	27.1	27.7	27.2	27.3	27.4		Nd_ppm_m146	1.00271	0.959423	0.97385	0.988278	0.981064	0.984671	1.02795	0.977457	0.999098	0.981064	0.984671	0.988278	0.987376		27.375	0.471217	1.72134
			Nd_ppm_m146_Int2SE	1	1.1	1.7	1.3	1.1	1.5	1.7	1.5	1.8	1.7	1.4	1.4
Sm	6.438		Sm_ppm_m147	6.49	6.32	6.07	6.59	6.61	6.14	6.49	6.41	6.38	6.12	6.93	6.34		Sm_ppm_m147	1.00808	0.981671	0.942839	1.02361	1.02672	0.953712	1.00808	0.995651	0.990991	0.950606	1.07642	0.984778	0.995263		6.4075	0.24159	3.77043
			Sm_ppm_m147_Int2SE	0.53	0.47	0.49	0.44	0.65	0.36	0.56	0.57	0.6	0.49	0.64	0.44
Eu	1.919		Eu_ppm_m153	1.84	1.95	1.75	1.84	1.98	1.95	1.99	1.85	1.86	1.84	1.82	1.9		Eu_ppm_m153	0.958833	1.01615	0.911933	0.958833	1.03179	1.01615	1.037	0.964044	0.969255	0.958833	0.948411	0.990099	0.980111		1.88083	0.0731696	3.89027
			Eu_ppm_m153_Int2SE	0.12	0.14	0.16	0.15	0.15	0.17	0.2	0.19	0.17	0.15	0.12	0.15
Gd	6.36		Gd_ppm_m157	6.51	6.45	6.46	6.29	6.58	6.4	6.6	6.12	6.74	6.25	6.66	6.96		Gd_ppm_m157	1.02358	1.01415	1.01572	0.988994	1.03459	1.00629	1.03774	0.962264	1.05975	0.982704	1.04717	1.09434	1.02227		6.50167	0.228904	3.52069
			Gd_ppm_m157_Int2SE	0.56	0.51	0.52	0.5	0.52	0.59	0.57	0.57	0.56	0.52	0.48	0.51
Tb	0.983		Tb_ppm_m159	0.97	0.944	0.883	0.941	1.006	1.034	1.02	0.993	0.907	0.958	0.985	0.995		Tb_ppm_m159	0.986775	0.960326	0.898271	0.957274	1.0234	1.05188	1.03764	1.01017	0.922686	0.974568	1.00203	1.01221	0.986436		0.969667	0.0451952	4.6609
			Tb_ppm_m159_Int2SE	0.079	0.07	0.057	0.048	0.075	0.091	0.079	0.072	0.077	0.095	0.069	0.066
Dy	6.087		Dy_ppm_m163	5.93	6.13	5.68	6.15	6.34	6.07	6.2	6.22	5.83	6.2	5.92	6.24		Dy_ppm_m163	0.974207	1.00706	0.933136	1.01035	1.04156	0.997207	1.01856	1.02185	0.957779	1.01856	0.972564	1.02514	0.998165		6.07583	0.195283	3.2141
			Dy_ppm_m163_Int2SE	0.35	0.4	0.39	0.33	0.43	0.45	0.47	0.45	0.37	0.46	0.38	0.29
Ho	1.248		Ho_ppm_m165	1.255	1.203	1.2	1.226	1.255	1.288	1.337	1.239	1.288	1.26	1.359	1.33		Ho_ppm_m165	1.00561	0.963942	0.961538	0.982372	1.00561	1.03205	1.07131	0.992788	1.03205	1.00962	1.08894	1.06571	1.01763		1.27	0.051781	4.07724
			Ho_ppm_m165_Int2SE	0.068	0.083	0.1	0.082	0.064	0.092	0.096	0.099	0.095	0.1	0.085	0.11
Er	3.524		Er_ppm_m166	3.34	3.7	3.6	3.53	3.6	3.55	3.77	3.39	3.35	3.52	3.51	3.51		Er_ppm_m166	0.947787	1.04994	1.02157	1.0017	1.02157	1.00738	1.06981	0.961975	0.950624	0.998865	0.996027	0.996027	1.00194		3.53083	0.129927	3.67979
			Er_ppm_m166_Int2SE	0.3	0.32	0.33	0.27	0.31	0.25	0.35	0.29	0.31	0.3	0.2	0.31
Tm	0.488		Tm_ppm_m169	0.504	0.53	0.484	0.486	0.492	0.526	0.528	0.468	0.523	0.512	0.534	0.471		Tm_ppm_m169	1.03279	1.08607	0.991803	0.995902	1.0082	1.07787	1.08197	0.959016	1.07172	1.04918	1.09426	0.965164	1.03449		0.504833	0.0239425	4.74265
			Tm_ppm_m169_Int2SE	0.057	0.061	0.054	0.051	0.051	0.052	0.062	0.05	0.07	0.06	0.052	0.051
Yb	3.328		Yb_ppm_m172	3.53	3.18	3.08	3.42	3.46	3.74	3.33	3.01	3.15	3.61	3.44	3.19		Yb_ppm_m172	1.0607	0.955529	0.925481	1.02764	1.03966	1.1238	1.0006	0.904447	0.946514	1.08474	1.03365	0.958534	1.00511		3.345	0.225691	6.74711
			Yb_ppm_m172_Int2SE	0.41	0.31	0.28	0.29	0.37	0.35	0.36	0.24	0.34	0.35	0.26	0.29
Lu	0.485		Lu_ppm_m175	0.484	0.531	0.484	0.482	0.484	0.488	0.491	0.486	0.483	0.529	0.452	0.482		Lu_ppm_m175	0.997938	1.09485	0.997938	0.993814	0.997938	1.00619	1.01237	1.00206	0.995876	1.09072	0.931959	0.993814	1.00962		0.489667	0.0212146	4.33246
			Lu_ppm_m175_Int2SE	0.059	0.052	0.052	0.052	0.052	0.048	0.063	0.057	0.07	0.069	0.048	0.046
Hf	4.721		Hf_ppm_m177	4.91	4.77	4.5	4.76	5	4.84	4.98	4.86	4.73	4.66	4.78	4.93		Hf_ppm_m177	1.04003	1.01038	0.953188	1.00826	1.0591	1.02521	1.05486	1.02944	1.00191	0.987079	1.0125	1.04427	1.01885		4.81	0.142318	2.9588
			Hf_ppm_m177_Int2SE	0.37	0.34	0.48	0.34	0.38	0.32	0.45	0.39	0.32	0.38	0.34	0.4
Ta	0.72		Ta_ppm_m181	0.77	0.697	0.755	0.649	0.736	0.724	0.822	0.741	0.73	0.699	0.802	0.771		Ta_ppm_m181	1.06944	0.968056	1.04861	0.901389	1.02222	1.00556	1.14167	1.02917	1.01389	0.970833	1.11389	1.07083	1.02963		0.741333	0.047498	6.40711
			Ta_ppm_m181_Int2SE	0.075	0.06	0.094	0.06	0.089	0.053	0.09	0.082	0.072	0.084	0.079	0.072
W	0.521		W_ppm_m182	0.534	0.558	0.449	0.443	0.507	0.555	0.5	0.499	0.503	0.501	0.543	0.541		W_ppm_m182	1.02495	1.07102	0.861804	0.850288	0.973129	1.06526	0.959693	0.957774	0.965451	0.961612	1.04223	1.03839	0.980966		0.511083	0.0375511	7.34735
			W_ppm_m182_Int2SE	0.081	0.071	0.059	0.081	0.054	0.071	0.068	0.084	0.093	0.075	0.092	0.085
Tl	0.201		Tl_ppm_m205	0.248	0.239	0.216	0.274	0.244	0.224	0.234	0.227	0.263	0.237	0.209	0.234		Tl_ppm_m205	1.23383	1.18905	1.07463	1.36318	1.21393	1.11443	1.16418	1.12935	1.30846	1.1791	1.0398	1.16418	1.18118		0.237417	0.0184117	7.75504		Tl can be be inhomogenouse in BCR-2G (see Jenner & O'Neill, 2012)
			Tl_ppm_m205_Int2SE	0.03	0.038	0.031	0.04	0.034	0.035	0.032	0.033	0.044	0.037	0.027	0.036
Pb	9.959		Pb_ppm_m208	10.07	10.5	10.86	10.12	10.68	10.45	10.8	10.41	10.58	10.24	10.23	10.16		Pb_ppm_m208	1.01115	1.05432	1.09047	1.01617	1.0724	1.0493	1.08445	1.04529	1.06236	1.02822	1.02721	1.02018	1.04679		10.425	0.267463	2.56559
			Pb_ppm_m208_Int2SE	0.48	0.56	0.63	0.42	0.61	0.5	0.8	0.66	0.78	0.68	0.49	0.52
Bi	0.0495337		Bi_ppm_m209	0.03	0.028	0.059	0.042	0.036	0.036	0.0392	0.032	0.044	0.0462	0.023	0.034		Bi_ppm_m209	0.605648	0.565272	1.19111	0.847907	0.726778	0.726778	0.79138	0.646025	0.888284	0.932698	0.46433	0.686401	0.756051		0.03745	0.00956818	25.5492		Bi can be be inhomogenouse in BCR-2G (see Jenner & O'Neill, 2012)
			Bi_ppm_m209_Int2SE	0.01	0.011	0.014	0.012	0.011	0.011	0.0095	0.011	0.012	0.0093	0.011	0.0096
Th	5.8		Th_ppm_m232	5.96	5.57	5.77	5.69	5.95	5.88	5.79	5.8	5.95	5.93	5.86	5.99		Th_ppm_m232	1.02759	0.960345	0.994828	0.981034	1.02586	1.01379	0.998276	1	1.02586	1.02241	1.01034	1.03276	1.00776		5.845	0.126239	2.15978
			Th_ppm_m232_Int2SE	0.29	0.29	0.31	0.25	0.22	0.29	0.26	0.26	0.28	0.37	0.33	0.26
U	1.72		U_ppm_m238	1.63	1.59	1.69	1.56	1.65	1.63	1.63	1.57	1.67	1.64	1.59	1.634		U_ppm_m238	0.947674	0.924419	0.982558	0.906977	0.959302	0.947674	0.947674	0.912791	0.97093	0.953488	0.924419	0.95	0.943992		1.62367	0.0392367	2.41655
			U_ppm_m238_Int2SE	0.12	0.12	0.11	0.13	0.11	0.11	0.1	0.1	0.12	0.11	0.1	0.092
																	Th/U	1.08432	1.03886	1.01249	1.08165	1.06938	1.06977	1.0534	1.09554	1.05658	1.07229	1.09295	1.08711	1.06755
